# Supplementary material for: Halozincate ionic liquid electrolyte enabled high-temperature dendrite-free Zn metal batteries
Source: Royal Society of Chemistry journal article supplement (doi:10.1039/d4ee06146b), 2025-01-01
Supplement: d4ee06146b3.pdf [file d4ee06146b3.pdf]

## Electronic Supplementary Information

# Halozincate Ionic Liquid Electrolyte Enabled High-Temperature Dendrite-free Zn Metal Batteries

Mingchen Yang,<sup>a</sup> Xiuyang Zou,<sup>b</sup> Mingzhu Wu,<sup>a</sup> Jiangtao Yu,<sup>a</sup> Xinyu Ma,<sup>a</sup> Yin Hu<sup>a,\*</sup> and Feng Yan<sup>a,\*</sup>

<sup>a</sup>Jiangsu Engineering Laboratory of Novel Functional Polymeric Materials, Jiangsu Key Laboratory of Advanced Negative Carbon Technologies College of Chemistry, Suzhou Key Laboratory of Soft Material and New Energy, College of Chemistry, Chemical Engineering and Materials Science, Soochow University, Suzhou 215123, China.

E-mail: [yinhu045@suda.edu.cn](mailto:yinhu045@suda.edu.cn); or [fyan@suda.edu.cn](mailto:fyan@suda.edu.cn)

<sup>b</sup>Jiangsu Engineering Research Center for Environmental Functional Materials, School of Chemistry and Chemical Engineering, Huaiyin Normal University, Huaian, 223300, China.

## Experimental Procedures

### Materials

1-Methylimidazole, 1-chlorohexane, bromoethane, zinc chloride ( $\text{ZnCl}_2$ ;  $\geq 99\%$ ), N-methyl-2-pyrrolidone (NMP, 99.9% purity), dimethyl sulfoxide-d6 (DMSO-d6, 99.9% purity), ether, and ethyl acetate were purchased from Sigma-Aldrich. Zinc foil (10  $\mu\text{m}$ ), titanium foil (10  $\mu\text{m}$ ), and the NVP, PVDF binder with an average  $M_w$  of  $\sim 534,000$ , Super P (99.5% purity), glass fiber separator (Whatman GF/D) were purchased from Shenzhen kejing star technology company. All chemical reagents were employed without further purification. Deionized water was used throughout the experiment.

### Synthesis of Imidazolium-Type ILs

[HMIM]Cl was synthesized as follows: A mixture containing 1-methylimidazole (10.34 g, 0.11 mol) and 1-chlorohexane (12.1 g, 0.10 mol) was stirred at 80 °C for 3 days. The products were washed with ethyl acetate and ether 3 times, then dried for 24 h under a dynamic vacuum at 60 °C.  $^1\text{H}$  NMR (400 MHz, DMSO-d6):  $\delta=9.33$  (s, 1H), 7.82 (s, 1H), 7.74 (s, 1H), 4.17 (t, 2H), 3.86 (s, 3H), 1.76 (m, 2H), 1.24 (m, 2H), 0.85 (t, 3H) (**Fig. S1A**).

[HMIM] $_2$ [ZnCl $_4$ ] was synthesized via the stirring of [HMIM]Cl with anhydrous  $\text{ZnCl}_2$  at 50 °C for 8 h until a homogeneous and transparent target liquid was obtained.  $^1\text{H}$  NMR (400 MHz, DMSO-d6):  $\delta=9.18$  (s, 1H), 7.78 (s, 1H), 7.71 (s, 1H), 4.17 (t, 2H), 3.86 (s, 3H), 1.76 (m, 2H), 1.24 (m, 2H), 0.85 (t, 3H) (**Fig. S1B**).

[EMIM][TFSI] was synthesized as follows: A mixture containing 1-methylimidazole (10.34 g, 0.11 mol) and bromoethane (10.89 g, 0.10 mol) was stirred at 25 °C for 24 h. The products 1-Ethyl-3-methylimidazolium bromide ([EMIM]Br) were washed with ethyl acetate and ether 3 times, then dried for 24 h under a dynamic vacuum at 60 °C. The ionic liquid was mixed with an equal molar amount of LiTFSI. The obtained solution was stirred for anion exchange at room temperature for 4 h. The mixture was washed three times with deionized water and dried under vacuum at 60 °C.  $^1\text{H}$  NMR (400 MHz, DMSO-d6):  $\delta=9.09$  (s, 1H), 7.77 (s, 1H), 7.68 (s, 1H), 4.17 (t, 2H), 3.83 (s, 3H), 1.40 (t, 3H) (**Fig. S3**).

## Preparation of halozincate ionic liquid electrolytes

The HZLE-1 consists of [HMIM]<sub>2</sub>[ZnCl<sub>4</sub>], ZnCl<sub>2</sub>, and [EMIM][TFSI] in a molar ratio of 1:2:1, while HZLE-0.5 and HZLE-2 have molar ratios of 1:2:2 and 2:4:1 for their components, respectively.

## Preparation of electrodes

To prepare the NVP slurry, a mixture consisting of 75 wt% Na<sub>3</sub>V<sub>2</sub>(PO<sub>4</sub>)<sub>3</sub> as the active material, 15 wt% Super P as a conductive agent, and 10 wt% polyvinylidene fluoride (PVDF) as the binder in NMP solvent was stirred overnight to achieve a homogeneous slurry. Subsequently, the cathode slurry was cast onto titanium foil using a standard doctor-blade technique, followed by drying at 80 °C overnight in an oven.

## Characterization

<sup>1</sup>H NMR spectra of the synthesized ILs were obtained with a Bruker Avance (400 MHz) spectrometer in DMSO-d<sub>6</sub>. FT-IR spectra of ILs were recorded with an IR Tracer-100 over a range of 600-4000 cm<sup>-1</sup>. Viscosities of the electrolytes were analyzed with a rheometer (MCR 702 TwinDrive) via scanning a temperature from 25 to 120 °C. TGA was conducted with a Perkin Elmer 4000 in a nitrogen atmosphere with a heating rate of 5 °C min<sup>-1</sup>. The morphology and element analyses of the samples were examined by SEM (Hitachi Regulus 8230, Japan) equipped with an EDS attachment and AFM (Bruker Multimode8, USA). XRD was performed on a Bruker D8 VENTURE X-ray diffractometer (50 kV, 1 mA) using Cu K $\alpha$  radiation ( $\lambda = 1.5418 \text{ \AA}$ ). Raman and in-situ Raman spectra were obtained using a confocal micro-Raman system (XploRA PLUS, Jobin Yvon, France). All experiments were carried out at an excitation line of 638 nm from an internal He-Ne laser with a power of 8.37 mW. The metal ions concentrations in the electrolytes were investigated using a PerkinElmer Optima 5110 ICP-OES system. The electrolytes were diluted with an 8% aqueous solution of hydrochloric acid, and at least 5 ICP standard solutions were used to generate calibration curves, with correlation coefficients greater than 0.999. The wavelengths were used in the axial mode: sodium (589.592 nm), vanadium (292.401 nm), and zinc (213.857 nm). X-ray photoelectron spectroscopy (XPS) spectrum was obtained by using Thermo Scientific ESCALAB Xi+ and the characteristic

spectra of electrodes at different depths were probed by sputtering the electrodes with Ar<sup>+</sup> at different times.

### Electrochemical measurements

The NVP cathode is coated on Ti foil with an active mass loading of 9 mg cm<sup>-2</sup> for both CR2032 coin and pouch cells. Zn metal foil with thicknesses of 10 μm was used as an anode for both CR2032 coin and pouch cells. The Zn foil and NVP cathode were punched in a diameter of 16 mm for the CR2032 coin cell and 4 cm\* 5 cm (width \* length) for the pouch cell tests. The CR2032 coin and pouch cells were assembled using Whatman glass fiber as separator (Whatman GF/D). The N:P ratio of the coin cells and pouch cells is 2. All batteries were assembled in an argon-filled glove box with water and oxygen content maintained at < 0.1 ppm. GCD data were collected using a LAND-CT2001A battery testing instrument at temperatures ranging from 25 to 120 °C. CV tests were conducted on a CHI760C electrochemical workstation. Electrochemical impedance spectroscopy (EIS) tests were performed on the CHI760C with an AC voltage of 10 mV amplitude in the frequency ranging from 10<sup>5</sup> Hz to 0.1 Hz at various temperatures from 20 to 120 °C.

Ionic conductivities were tested by two blocking electrodes (SS) and calculated according to the following Equation S1:

$$\sigma_i = \frac{L}{R \times S} \quad (\text{S1})$$

where  $L$  and  $S$  represent the length between two electrodes and the area of the electrodes respectively.  $R$  is the resistance measured by EIS. The Zn ion transference number ( $t_{\text{Zn}^{2+}}$ ) was tested following the method described by Abraham et al,<sup>32</sup> Zn|HZLE-1|Zn symmetric cells were assembled and polarization potential ( $\Delta V$ ) at 50 mV was applied.  $t_{\text{Zn}^{2+}}$  is estimated by the following Equation S2:

$$t_{\text{Zn}^{2+}} = \frac{I^{SS}(\Delta V - I^0 R_i^0)}{I^0(\Delta V - I^{SS} R_i^{SS})} \quad (\text{S2})$$

Then the initial ( $I^0$ ) and steady-state ( $I^{SS}$ ) polarization current values were recorded. (**Fig. S8**). The initial and steady-state values of the bulk resistances ( $R_b^0$  and  $R_b^{SS}$ ) and electrode-electrolyte interfacial resistances ( $R_i^0$  and  $R_i^{SS}$ ) were examined using EIS before and after potentiostatic polarization. The first data point was recorded at 0.05 s.



## Molecular dynamics simulations

MD simulations were performed to investigate the solvation structure of ZnCl<sub>2</sub>-based electrolytes, together with the Zn conduction behavior under the electric field. All molecular dynamics simulations were performed using the Materials Studio software package. The force field used in simulation systems was COMPASSII, which assigned charges to all particles. Periodic boundary conditions were applied in the x, y, and z directions. For the long-range electrostatic interactions, the Ewald summation method was employed to achieve an accuracy of 0.0001 kcal mol<sup>-1</sup>, while the van der Waals interactions were calculated using the Atom-based summation method with a cutoff distance of 12.5 Å. In this study, the molecular models of [HMIM]<sub>2</sub>[ZnCl<sub>4</sub>], ZnCl<sub>2</sub>, and [EMIM][TFSI] were built and optimized. Each system contained 300 [HMIM]<sub>2</sub>[ZnCl<sub>4</sub>], 600 ZnCl<sub>2</sub>, and 300 [EMIM][TFSI]. The system was simulated with an outside electric field and without an electric field, where the electric field strength was 1.4 V Å<sup>-1</sup> in Z directions. These systems were subjected to the steepest-descent energy minimization of 2000 steps, followed by five cycles of annealing and a 3 ns NPT equilibrium simulation (time step=1 fs, frame output for every 10000 steps, T=298 K). Then, the production NVT simulation was performed for 1 ns (time step=1 fs, frame output for every 5000 steps, T=298 K).

## Recovery process of HZLE

After adding distilled water to HZLE-1, [HMIM]Cl remained dissolved in the water phase while [EMIM][TFSI] separated from the water due to its hydrophobicity. Consequently, Zn<sup>2+</sup> in the IL hydrolyzed and precipitated as Zn<sub>4</sub>(OH)<sub>8</sub>Cl<sub>2</sub>·H<sub>2</sub>O out of the water. As a result, [EMIM][TFSI] was separated and then subjected to rotary evaporation to obtain recycled [EMIM][TFSI]. At the meantime, the water-soluble [HMIM]Cl was recovered by dichloromethane extraction to remove the dissolved V and Na, and the dichloromethane was recycled by evaporation. The recovery rate is estimated by the following Equation S3:

$$Recovery\ rate = \frac{m_{recycled}}{m_{pristine}} \times 100\% \quad (S3)$$

where  $m_{recycled}$  and  $m_{pristine}$  are the mass of the recycled IL and initial raw material, respectively.

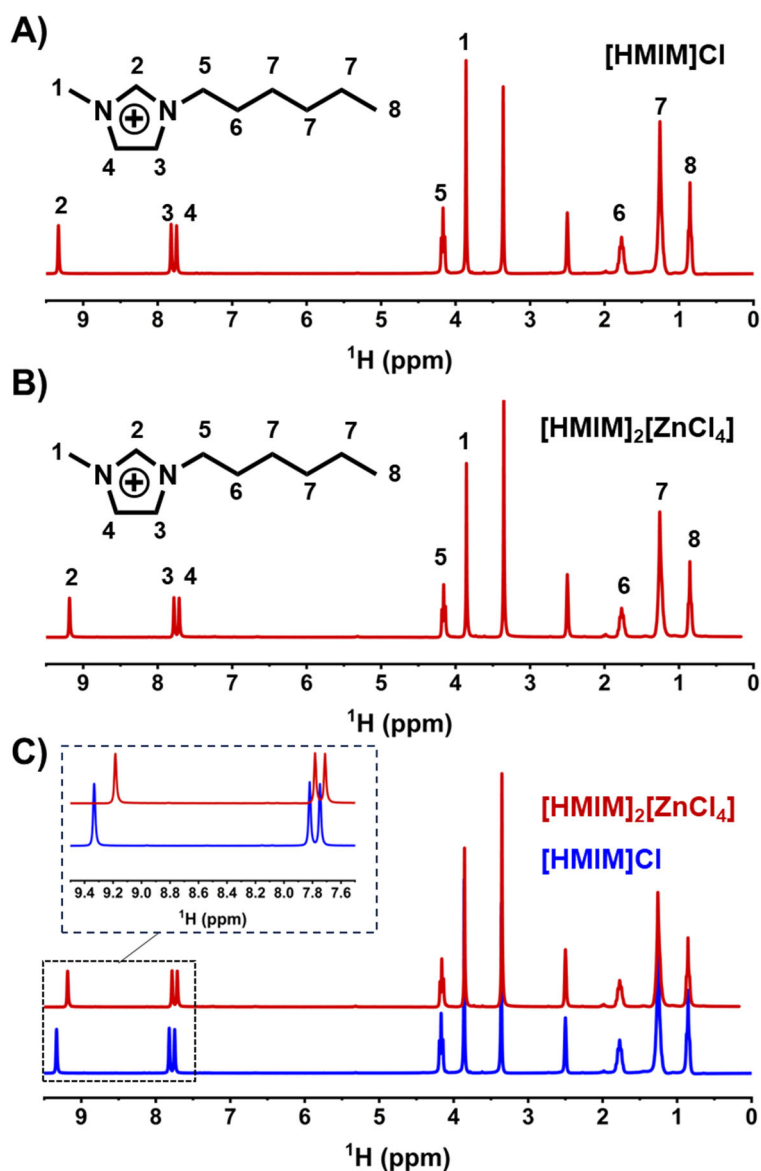

**Fig. S1**  $^1\text{H}$  NMR spectra of (A) [HMIM]Cl, (B) [HMIM] $_2$ [ZnCl $_4$ ], and (C) contrast magnification of C-H on the imidazolium cation, which indicates the effect of adding metal ions on the imidazolium cation. The characteristic peaks at 9.33 ppm, 7.82 ppm, and 7.74 ppm in the  $^1\text{H}$  NMR spectrum are attributed to the active hydrogens (C-2, C-3, and C-4) on the imidazolium ring which shifts to 9.18 ppm, 7.78 ppm, 7.71 ppm due to the coordination of metal ions.

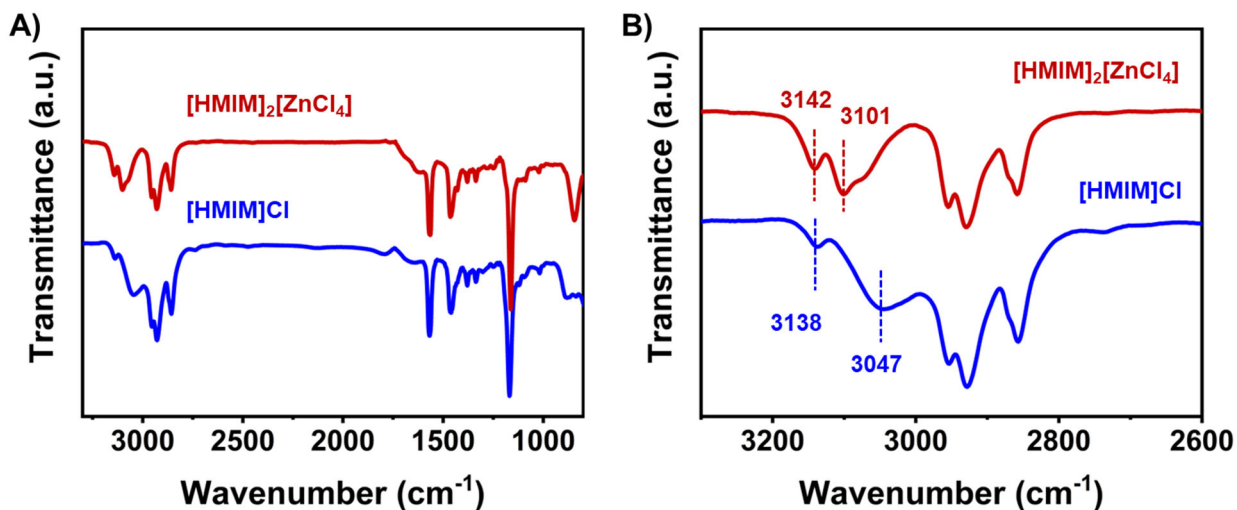

**Fig. S2** (A) FT-IR spectra of [HMIM]Cl and [HMIM]<sub>2</sub>[ZnCl<sub>4</sub>]. (B) Magnified spectral region of C-H on imidazolium cation. The peaks at 3047 and 3138 cm<sup>-1</sup>, corresponding to the stretching vibration band of C-H on the imidazolium cation, shifted to higher wavenumbers (3101 and 3142 cm<sup>-1</sup>) after coordinating with metal ions.

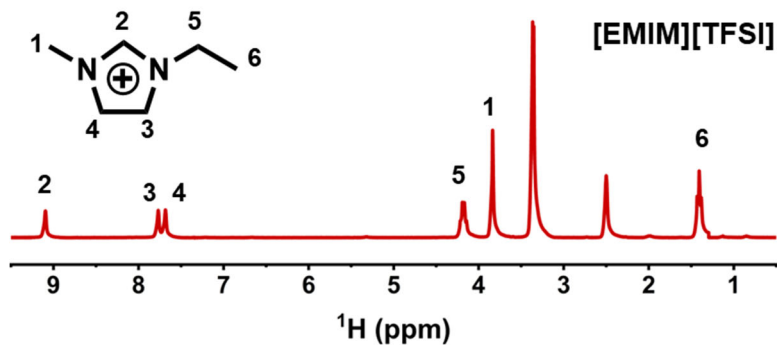

**Fig. S3** <sup>1</sup>H NMR spectrum of [EMIM][TFSI].

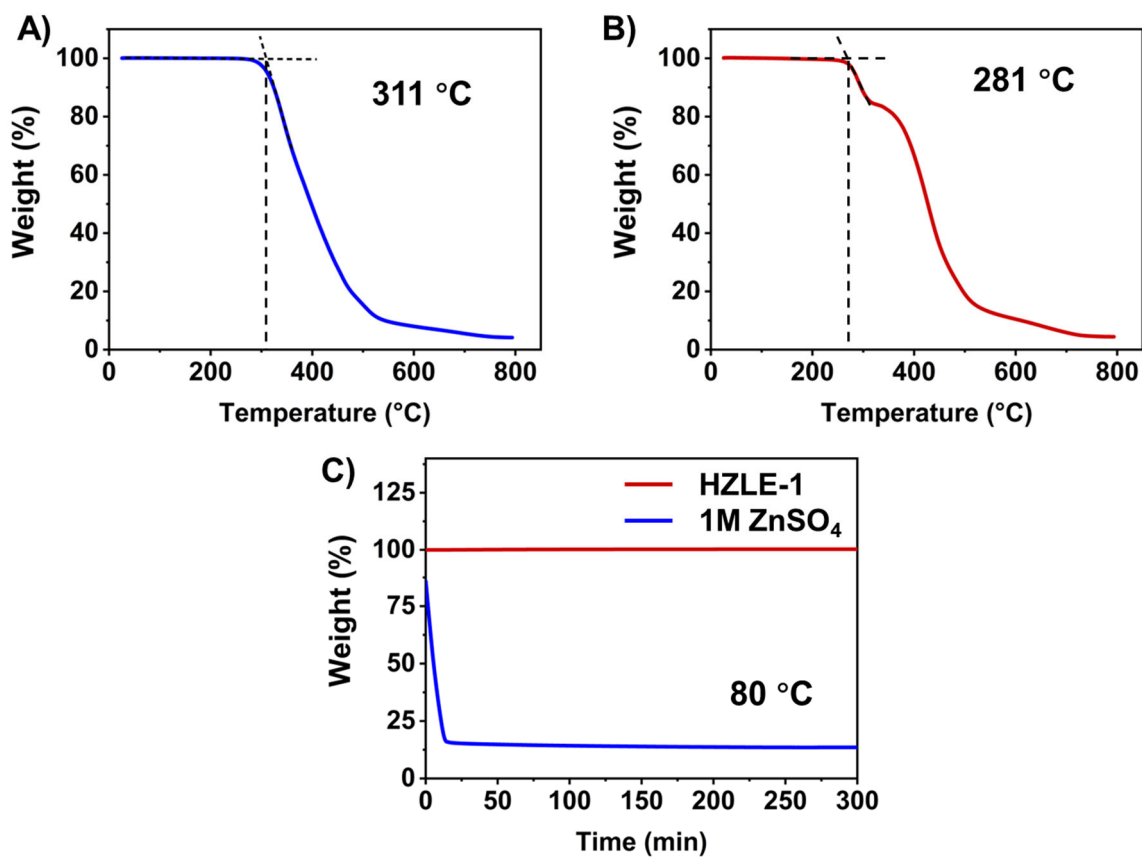

**Fig. S4** Thermal decomposition curves of (A) [HMIM]<sub>2</sub>[ZnCl<sub>4</sub>] and (B) HZLE-1 from 30 to 800 °C in N<sub>2</sub> (heating rate: 10 °C min<sup>-1</sup>). (C) Thermal stability of the HZLE-1 and 1M ZnSO<sub>4</sub> electrolyte. The electrolytes were heated at 80 °C for 5 h in N<sub>2</sub> atmosphere. The HZLE-1 exhibits high thermal stability without weight loss while the water in 1M ZnSO<sub>4</sub> is volatilized resulting in rapid weight loss.

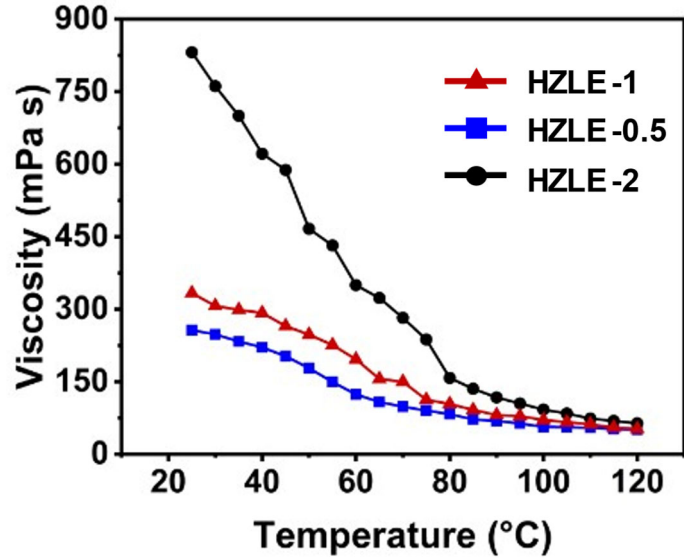

**Fig. S5** Viscosity of HZLE-1, HZLE-0.5, and HZLE-2 from 25 to 120 °C.

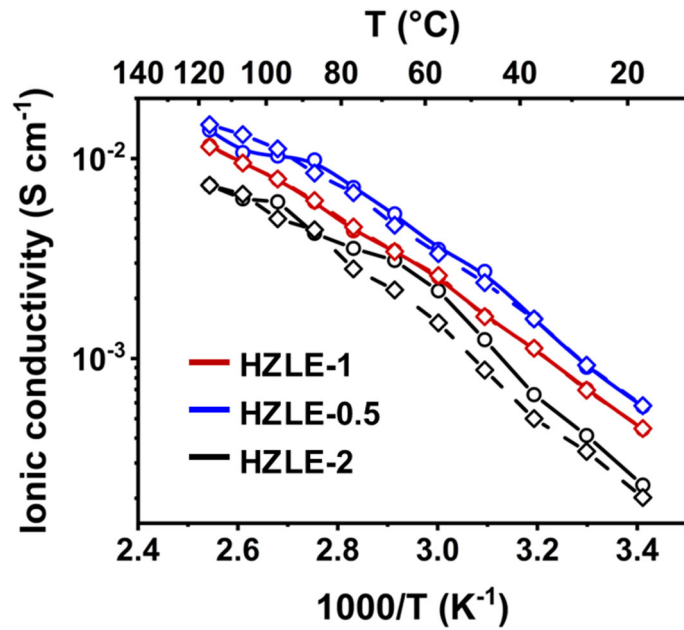

**Fig. S6** Arrhenius plots of the overall ionic conductivities of HZLE-1 compared with HZLE-0.5 and HZLE-2. The hysteresis loops for three electrolytes during the measurement cycle with a heating course (solid lines, from 20 to 120 °C), then a cooling course (dashed lines, from 120 to 20 °C). Each temperature was maintained for 5 h.

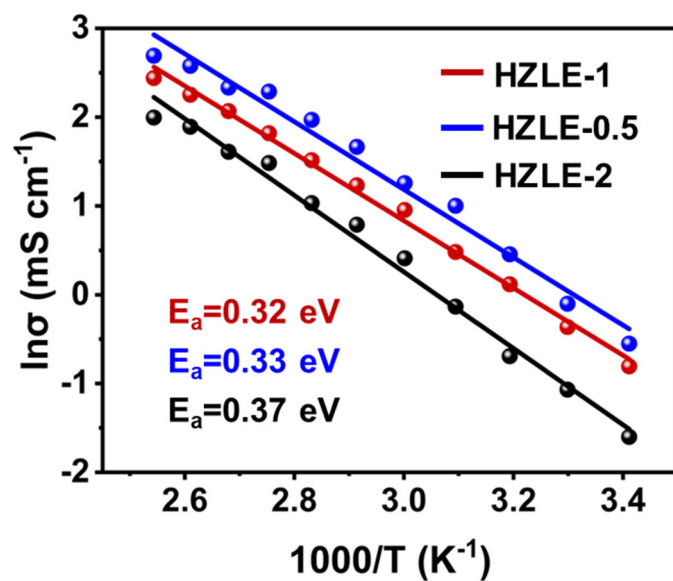

Fig. S7 Activation energies of ionic conductivities of HZLE-1, HZLE-0.5, and HZLE-2.

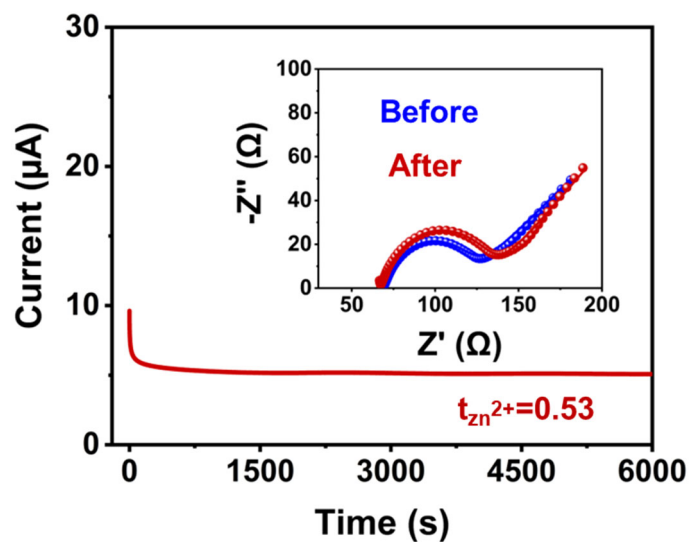

Fig. S8 Polarization curve and insert showed the Nyquist plots and fitting results before and after polarization of the Zn||Zn symmetric cell at 25 °C. Related parameters are presented in **Tables S1 and S2**.

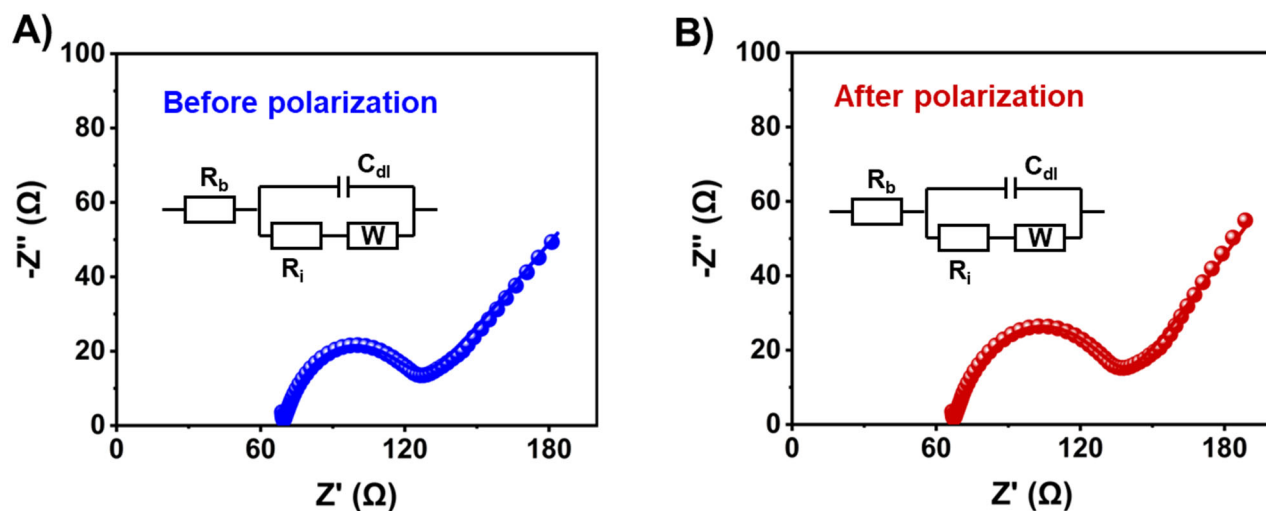

**Fig. S9** Nyquist plots and fitting results (A) before and (B) after polarization of the Zn||Zn symmetric cell at 25 °C. Insert shows the equivalent circuit diagrams.

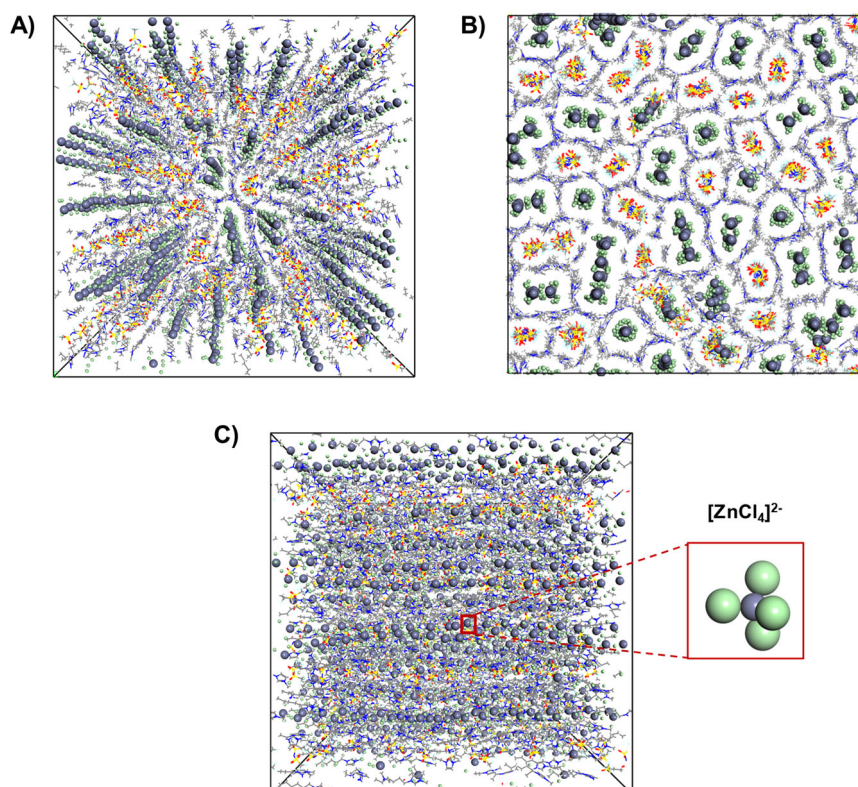

**Fig. S10** (A) Three-dimensional, (B) two-dimensional snapshots, and (C) the  $Zn^{2+}$  presences of  $[ZnCl_4]^{2-}$  state from MD simulation with the electric field (EF) in the HZLE-1 system (1.4 V).

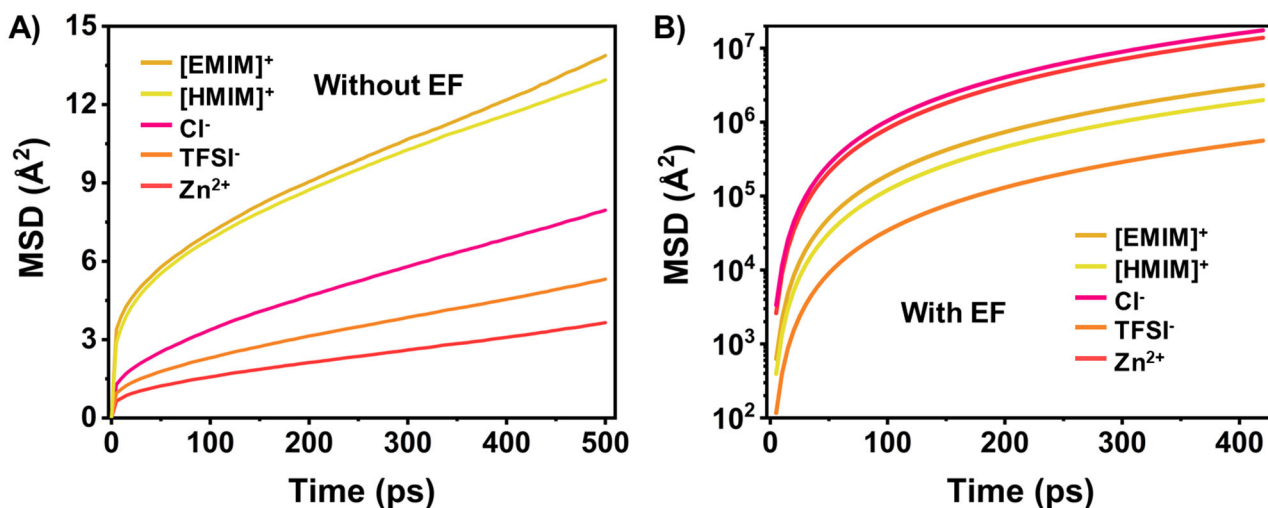

**Fig. S11** Mean square displacement (MSD) of Zn<sup>2+</sup>, Cl<sup>-</sup>, TFSI<sup>-</sup>, [EMIM]<sup>+</sup>, and [HMIM]<sup>+</sup> of the HZLE-1 system (A) without electric field (without EF) and (B) with electric field (with EF, 1.4 V).

The interval of 100-500 ps was selected for the calculation of the diffusivity based on the MSD-t curve, and the results of the diffusivity obtained through Equation S4 are displayed in **Fig. 1H**:

$$Diffusivity \approx \frac{dMSD(t)}{6dt} = \frac{MSD(t)}{6t} \quad (S4)$$



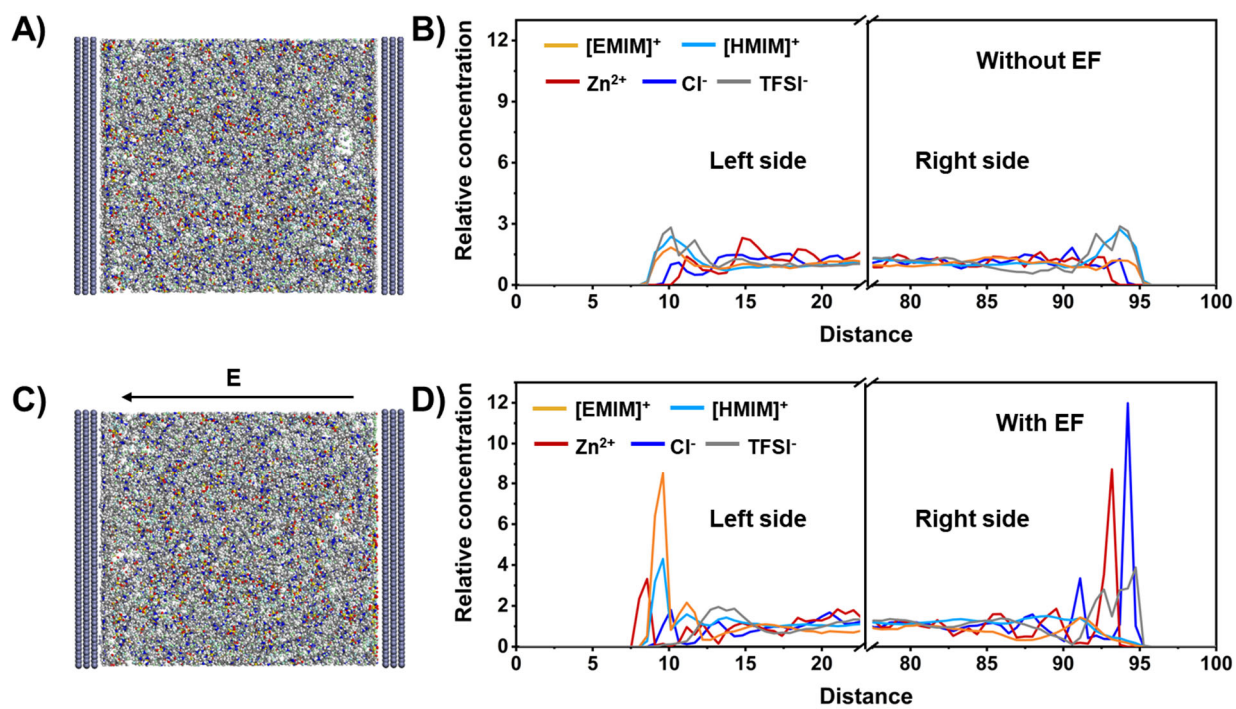

**Fig. S12** Snapshots of the distribution of the ions on Zn electrodes (A) without EF and (C) with EF. Relative concentrations of the molecular numbers along the  $z$ -axis normal to the surface of Zn electrodes (B) without EF and (D) with EF (bias potential of 0.5 V).

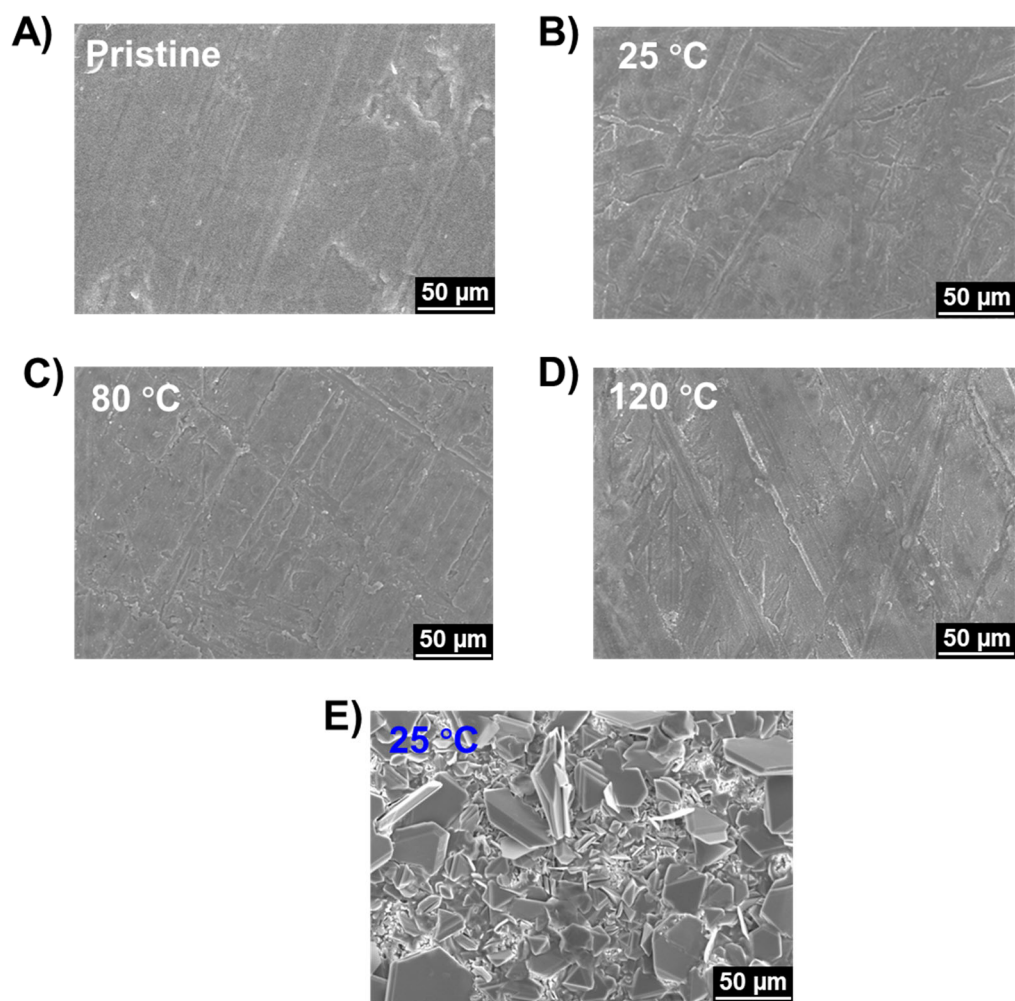

**Fig. S13** (A) SEM images of pristine Zn foil. The SEM images of the Zn metal anode after immersion in HZLE-1 for 72 h at (B) 25 °C, (C) 80 °C, and (D) 120 °C and (E) after immersion in 1M ZnSO<sub>4</sub> for 72 h at 25 °C.

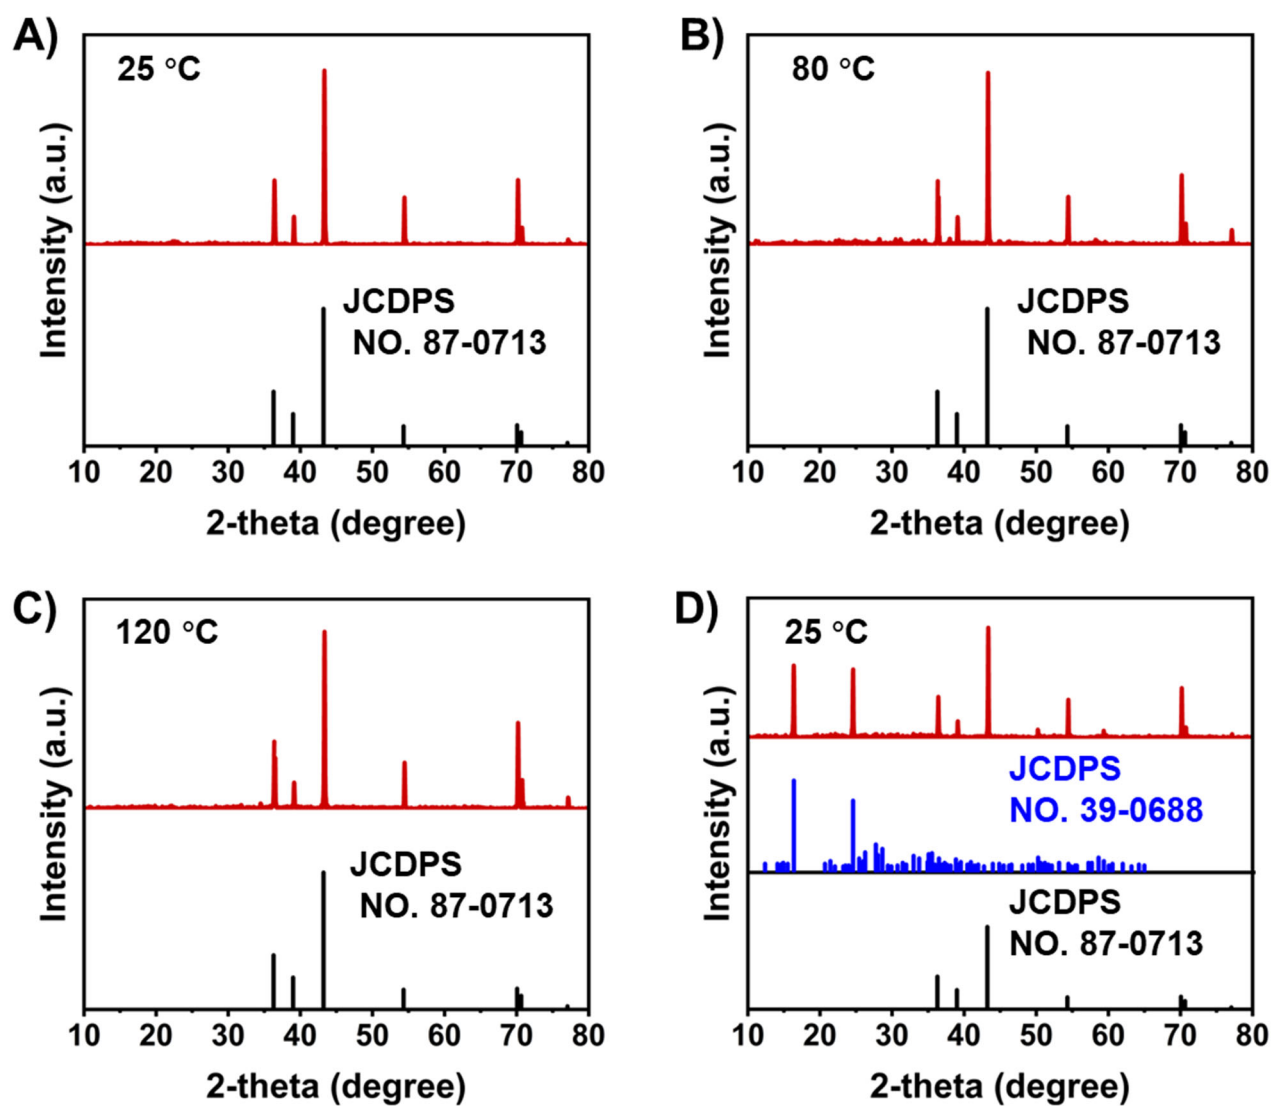

**Fig. S14** XRD patterns of Zn metal anode after immersion in HZLE-1 for 72 h at (A) 25 °C, (B) 80 °C, and (C) 120 °C and (D) immersion in 1M ZnSO<sub>4</sub> for 72 h at 25 °C.

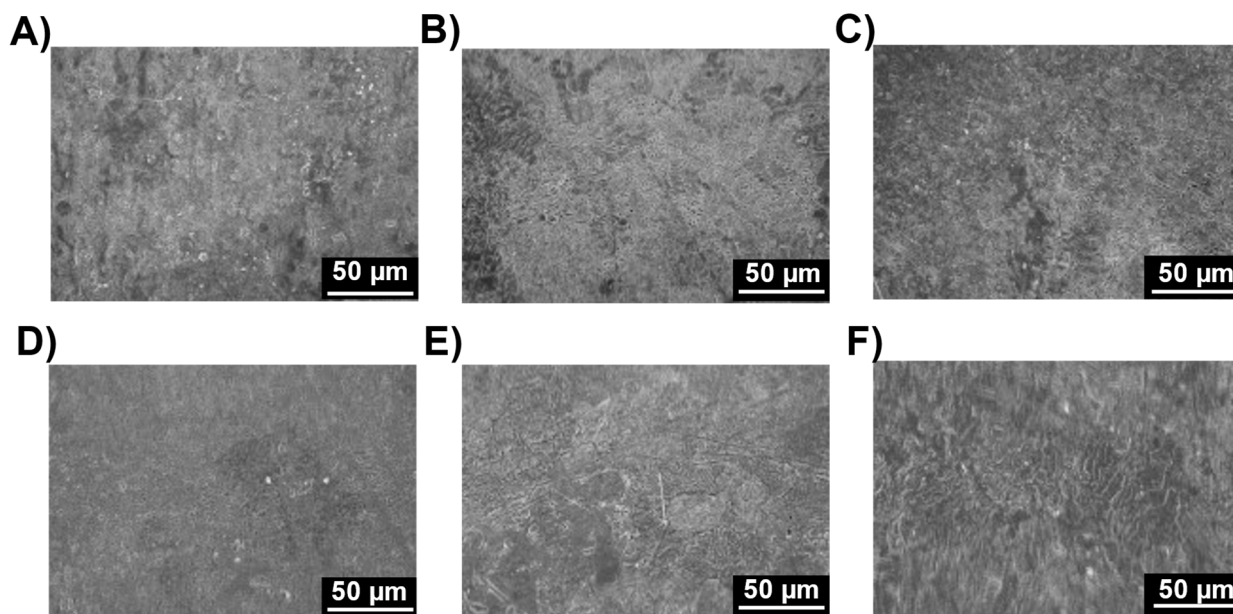

**Fig. S15** SEM images of Zn foil after 10 cycles of Zn||Zn symmetric cells in HZLE-1 with an areal capacity of  $6.25 \text{ mAh cm}^{-2}$  (depth of discharge (DOD)=50%) at a current density of  $0.2 \text{ mA cm}^{-2}$  under (A)  $25 \text{ }^\circ\text{C}$ , (B)  $80 \text{ }^\circ\text{C}$  and (C)  $120 \text{ }^\circ\text{C}$ . Images of Zn foil after 10 cycles in HZLE-1 with an areal capacity of  $10 \text{ mAh cm}^{-2}$  (DOD=80%) at a current density of  $1 \text{ mA cm}^{-2}$  under (D)  $25 \text{ }^\circ\text{C}$ , (E)  $80 \text{ }^\circ\text{C}$  and (F)  $120 \text{ }^\circ\text{C}$ .

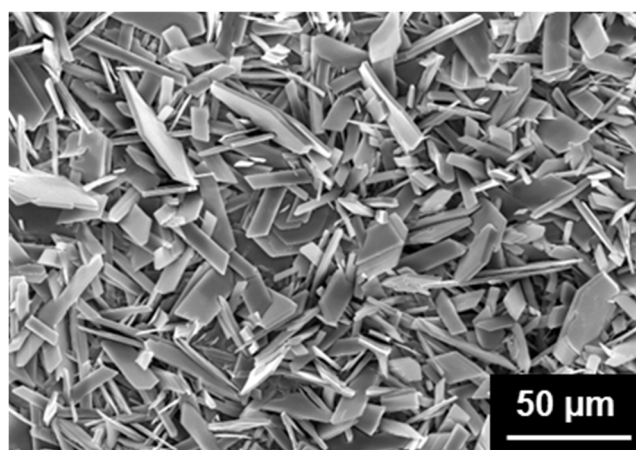

**Fig. S16** SEM image of Zn metal anode after 10 cycles of a Zn||Zn symmetric cell in an electrolyte of  $1 \text{ M ZnSO}_4$  under  $25 \text{ }^\circ\text{C}$  with an areal capacity of  $1.25 \text{ mAh cm}^{-2}$  (DOD=10%) at a current density of  $0.2 \text{ mA cm}^{-2}$ .

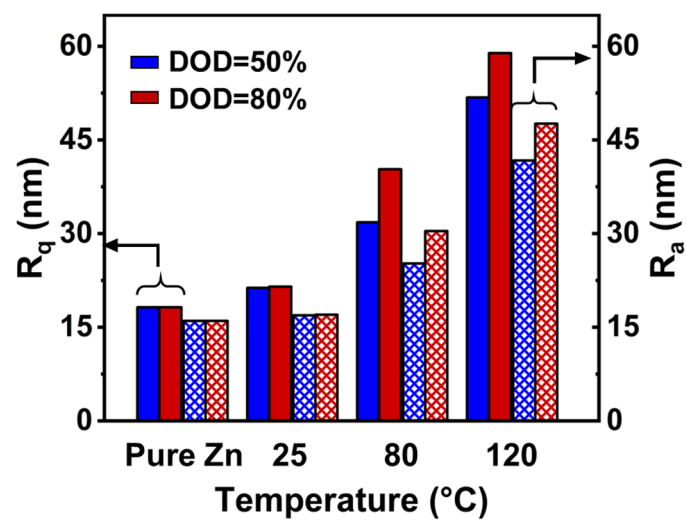

**Fig. S17**  $R_q$  and  $R_a$  of Zn deposits obtained with different DODs of 50% and 80% varying temperature from 25 to 120 °C.

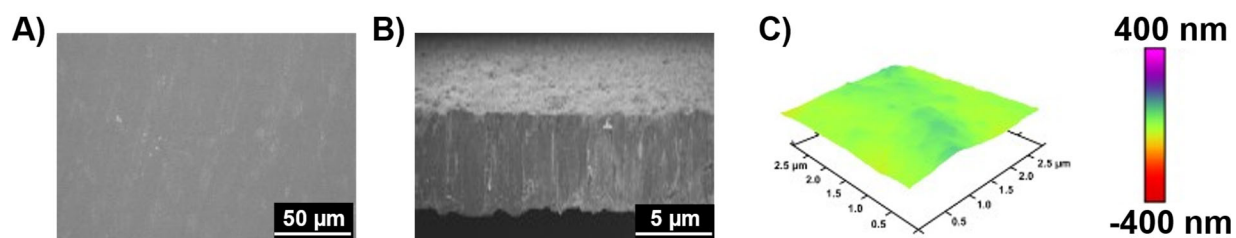

**Fig. S18** (A) Typical SEM image, (B) cross-sectional SEM image, and (C) 3D morphology image of the pristine Zn.

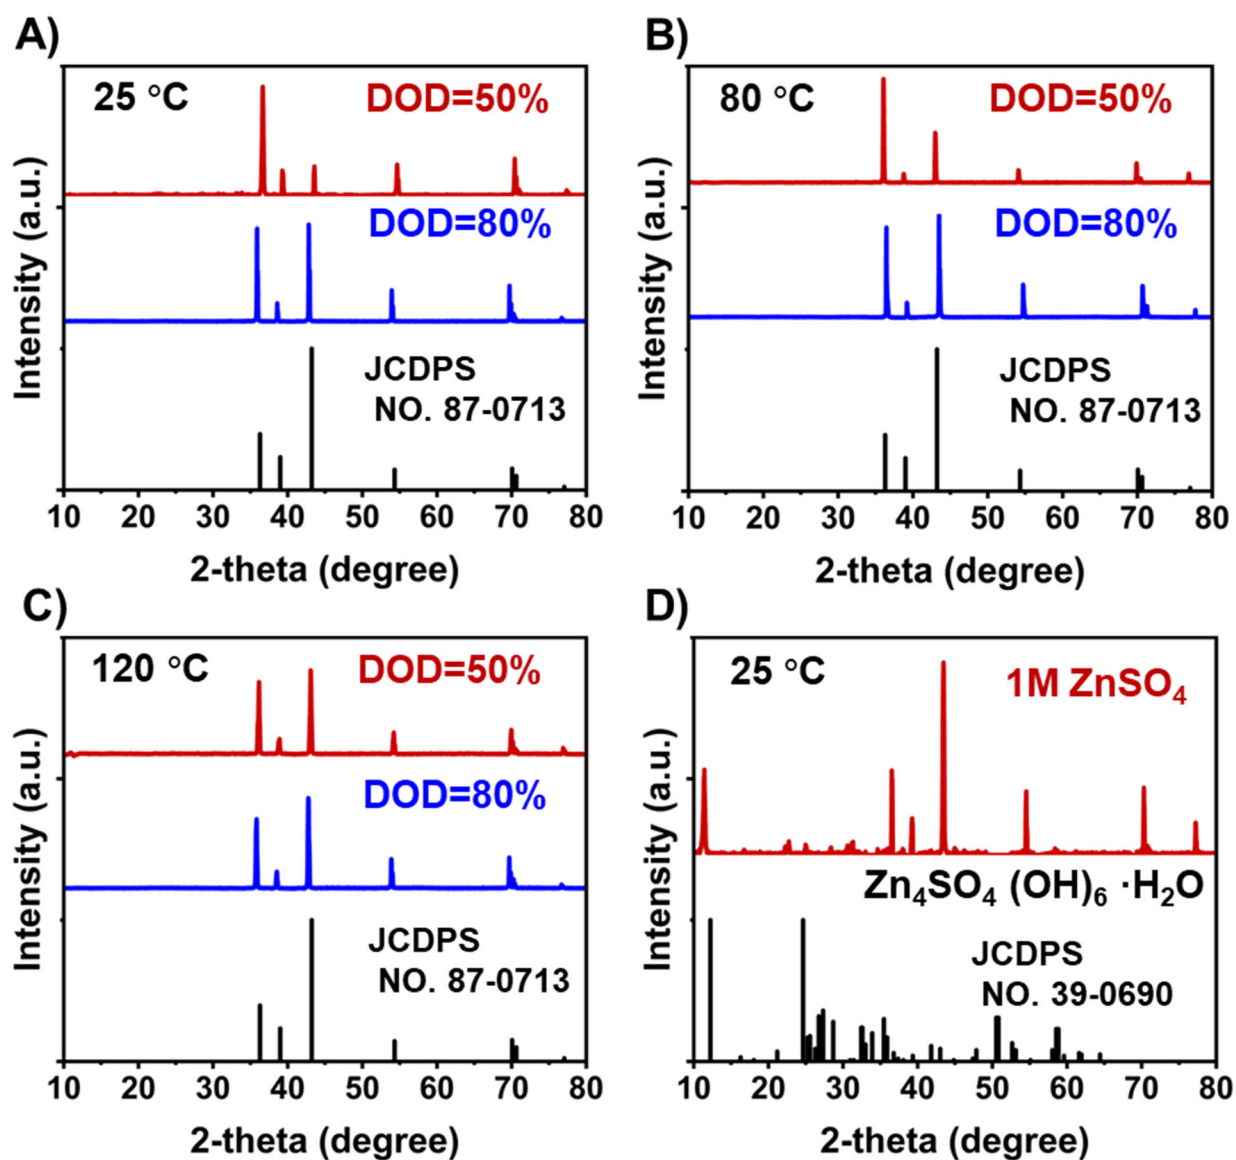

**Fig. S19** XRD patterns of Zn deposits with different DODs after 10 cycles of Zn||Zn symmetric cells with HZLE-1 at (A) 25 °C, (B) 80 °C, (C) 120 °C. (D) XRD pattern of Zn deposits with 0.2 mA cm<sup>-2</sup>, 10% DOD after 10 cycles of Zn||Zn symmetric cell with 1M ZnSO<sub>4</sub> aqueous electrolyte at 25 °C.



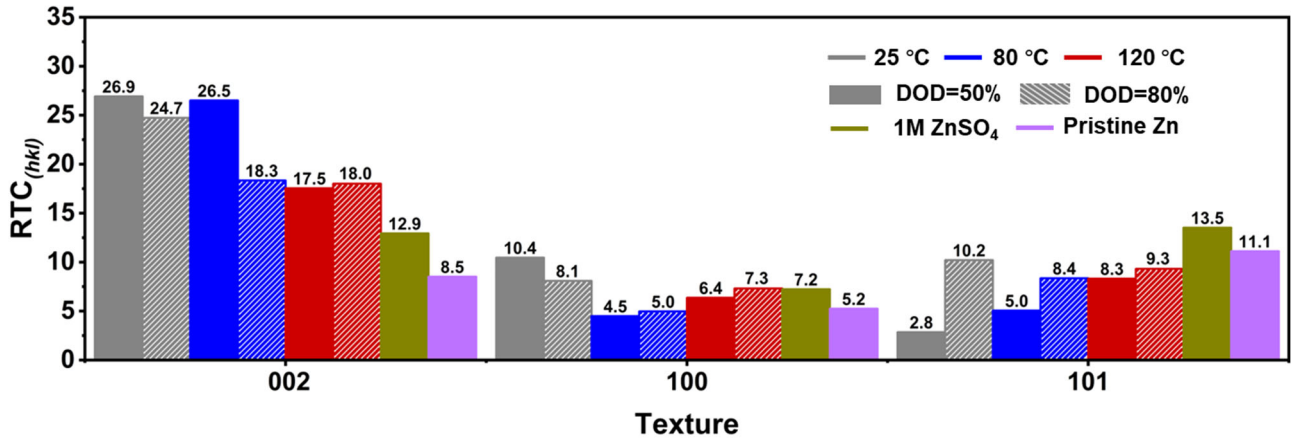

**Fig. S20**  $RTC_{(hkl)}$  of Zn deposits in HZLE-1, ZnSO<sub>4</sub> aqueous electrolyte, and pristine Zn without cycling obtained from **Fig. 3H** and **S19**.

Subsequently, the relative texture coefficients ( $RTC_s$ ) of each Zn lattice plane were calculated using Equation S5:

$$RCT_{(hkl)} = \frac{I_{(hkl)}/I_{0(hkl)}}{\sum(I_{(hkl)}/I_{0(hkl)})} \times 100 \quad (\text{S5})$$

where  $I_{(hkl)}$  is the intensity obtained from the textured sample, and  $I_{0(hkl)}$  is the intensity of the standard oriented sample (**Table S3**).

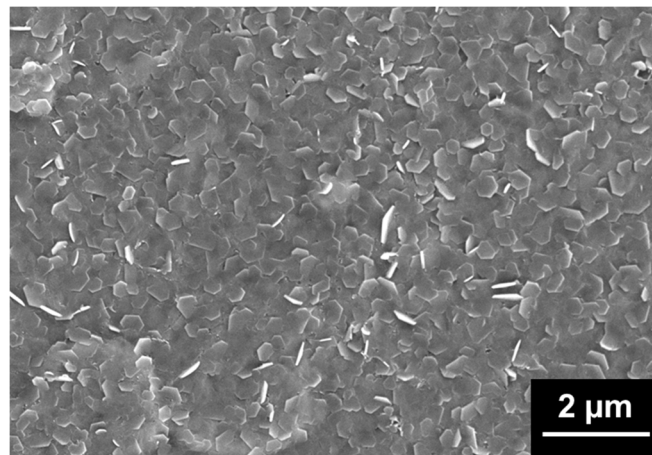

**Fig. S21** SEM image of Zn metal anode after 10 cycles in HZLE-1 under 120 °C with DOD of 80% at a current density of 1 mA cm<sup>-2</sup>.

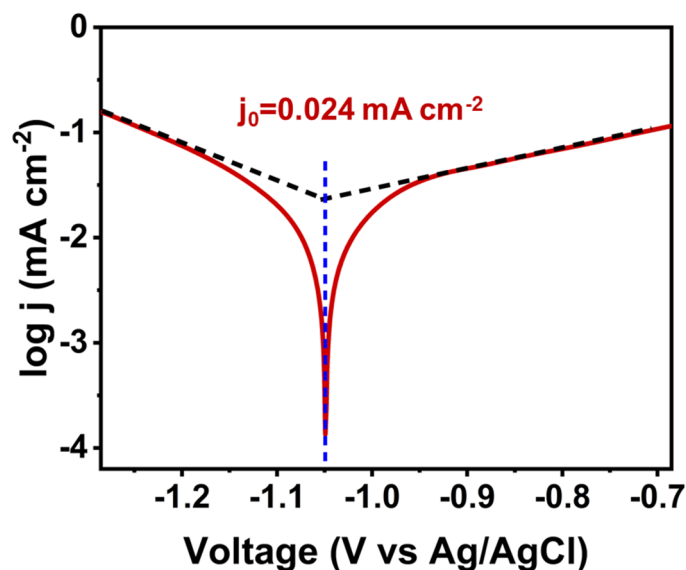

**Fig. S22** Exchange current density ( $j_0$ ) for Zn plating/stripping was calculated based on Tafel analysis, which involved using a Zn plate as the working and counter electrode (thickness of Zn plate: 50  $\mu\text{m}$ ), Ag/AgCl as the reference electrode, and conducting the analysis at a scan rate of 0.1  $\text{mV s}^{-1}$ . Tafel plot was generated by plotting the overpotential of Zn plating/stripping against the log of the current density in the CV curve. The calculation of  $j_0$  was determined by extracting the slope from the linear fitting of the overpotential to the applied current.

The kinetics of  $\text{Zn}^{2+}$  electroreduction are quantified as the faradaic current density  $j$  using the Butler-Volmer Equation S6 presented below:

$$j = j_0 [e^{-\alpha n f \eta} - e^{(1-\alpha) n f \eta}] \quad (\text{S6})$$

where  $j_0$  is the exchange current density,  $\alpha$  is the transfer coefficient,  $n$  is the number of electrons transferred, and  $\eta$  is the overpotential. Experimental interrogation of reaction kinetics is enabled through the relationship between measured values of  $j$  and  $\eta$ . Tafel plot analysis was executed to track the change in  $\log j$  as  $\eta$  varied to obtain  $j_0$  by extrapolating the measured  $j$  to the equilibrium state.



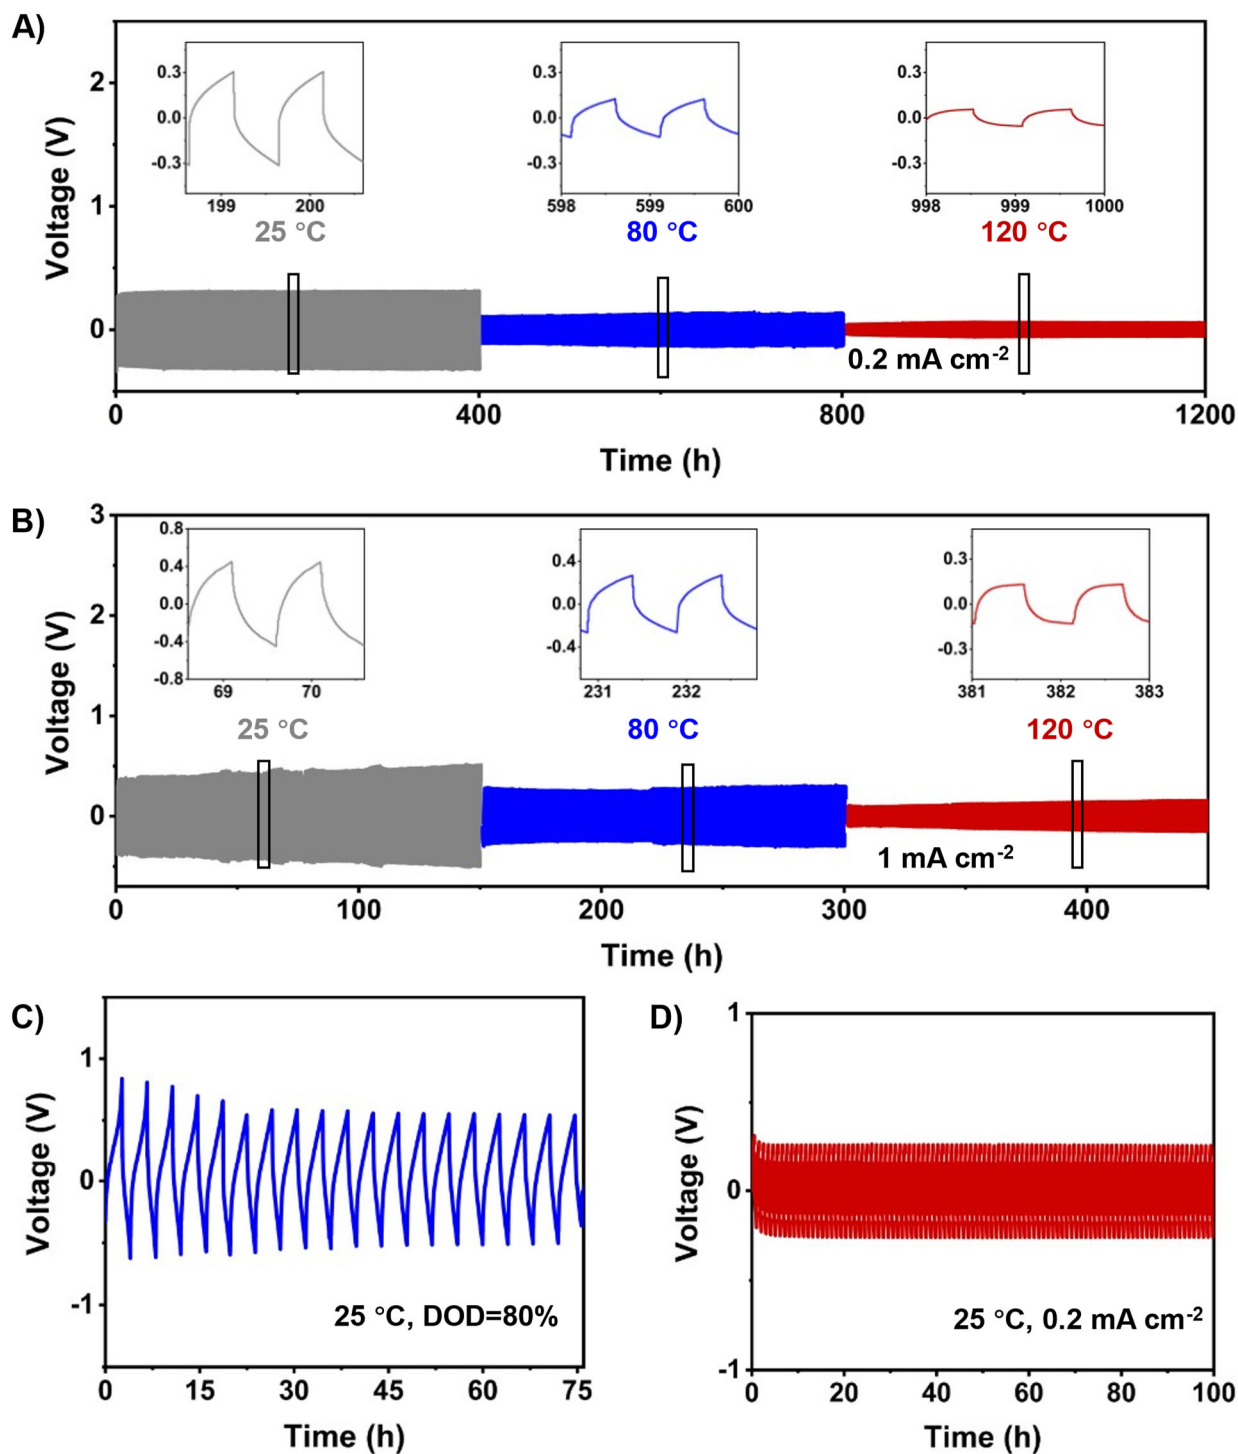

**Fig. S23** Cycling stability of the Zn||Zn symmetric cell using HZLE-1 was evaluated over a temperature range from 25 to 120 °C under various current densities and areal capacities. (A) 0.2 mA cm<sup>-2</sup> with an areal capacity of 0.2 mAh cm<sup>-2</sup>, (B) 1 mA cm<sup>-2</sup> with an areal capacity of 1 mAh cm<sup>-2</sup>. Cycling performance of Zn||Zn symmetric cell with a current density of (C) 5 mA cm<sup>-2</sup> and an areal capacity of 10 mAh cm<sup>-2</sup> at 25 °C (DOD=80%), (D) 0.2 mA cm<sup>-2</sup> and an areal capacity of 0.2 mAh cm<sup>-2</sup> at 25 °C with 30 μL electrolyte.

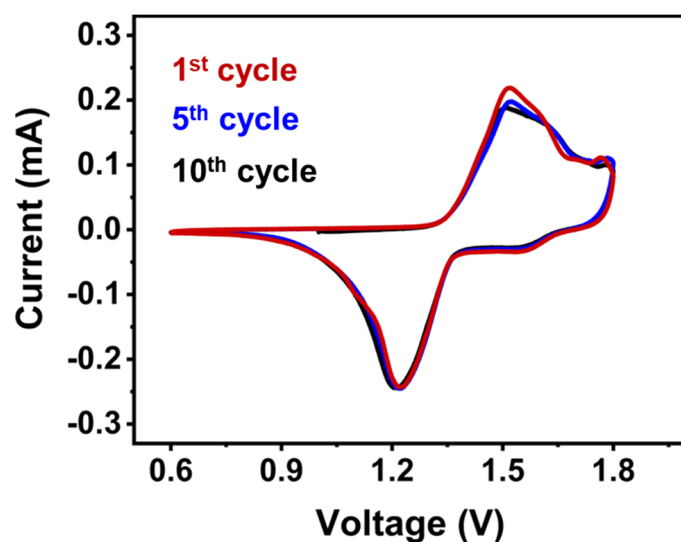

**Fig. S24** CV curves of NVP||Zn cell with HZLE-1 at  $0.1 \text{ mV s}^{-1}$  for different cycles at  $80 \text{ }^\circ\text{C}$ . The pair of oxidation/reduction peaks of  $\text{V}^{3+}/\text{V}^{4+}$  at around 1.45/1.21 V during the  $\text{Zn}^{2+}$  insertion/extraction process in NVP.

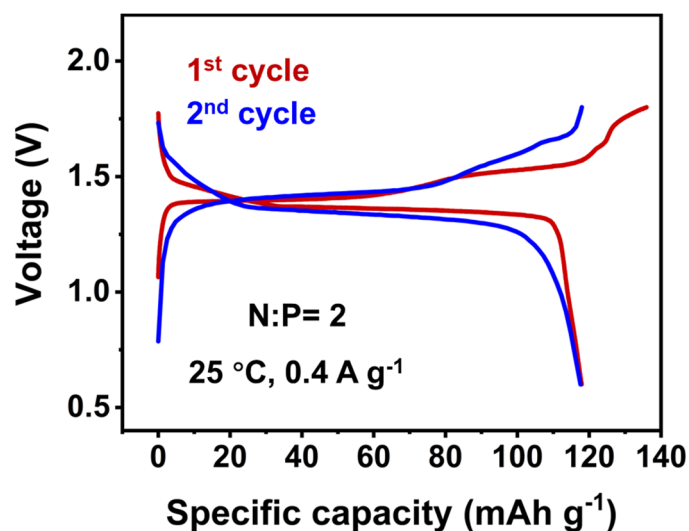

**Fig. S25** Charge/discharge profiles of NVP||Zn cell with HZLE-1 at the first cycle and second cycle with a current density of  $0.4 \text{ A g}^{-1}$  and N:P ratio of 2 at  $25 \text{ }^\circ\text{C}$ .

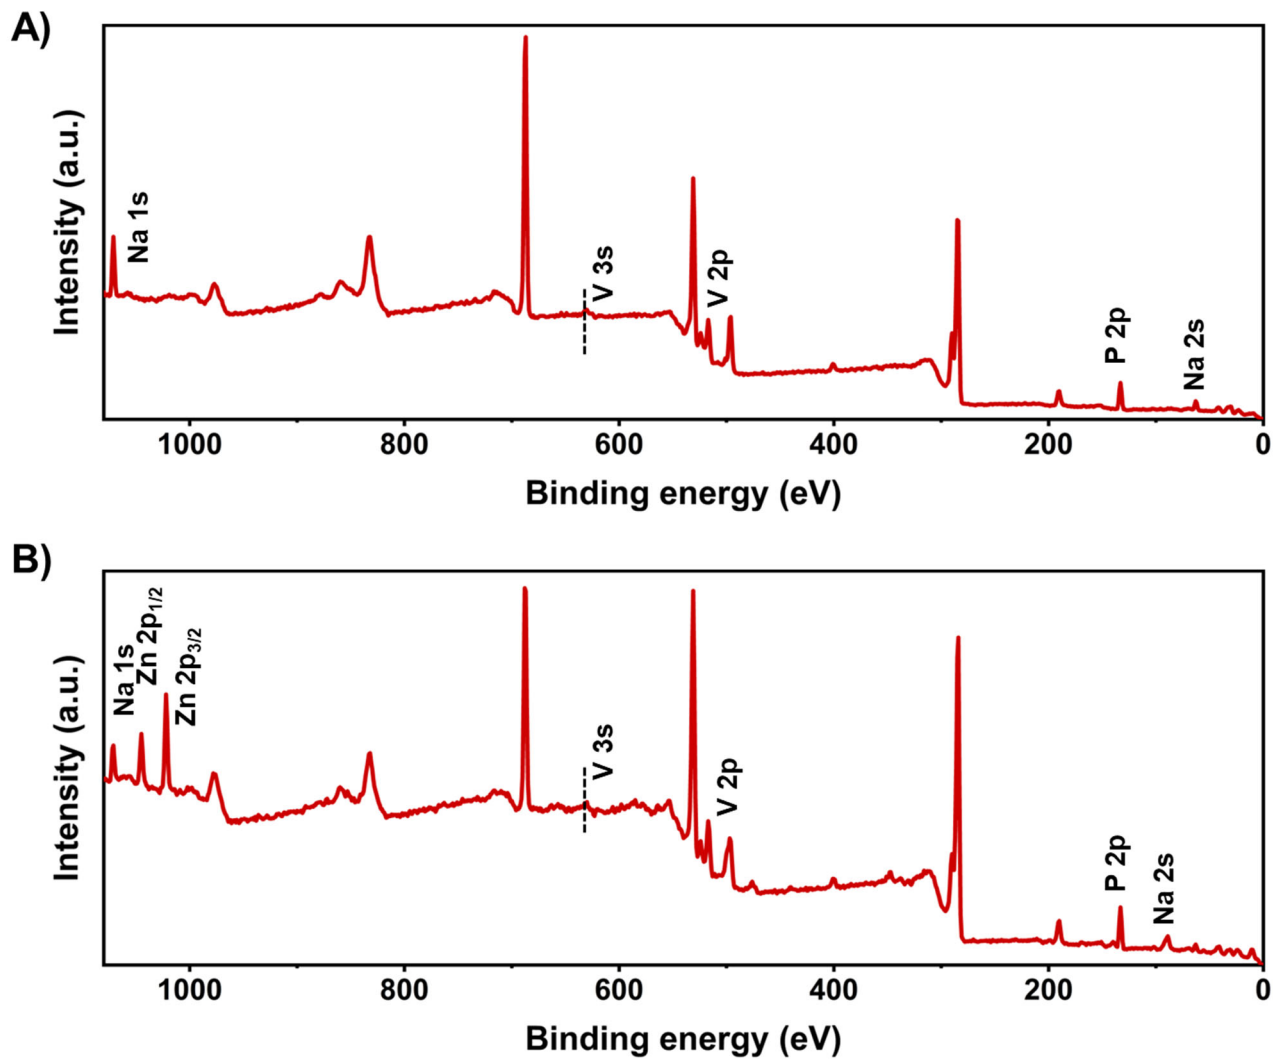

**Fig. S26** Full-scan XPS spectra of (A) pristine NVP cathode without cycling and (B) NVP cathode after discharging to 0.6 V.

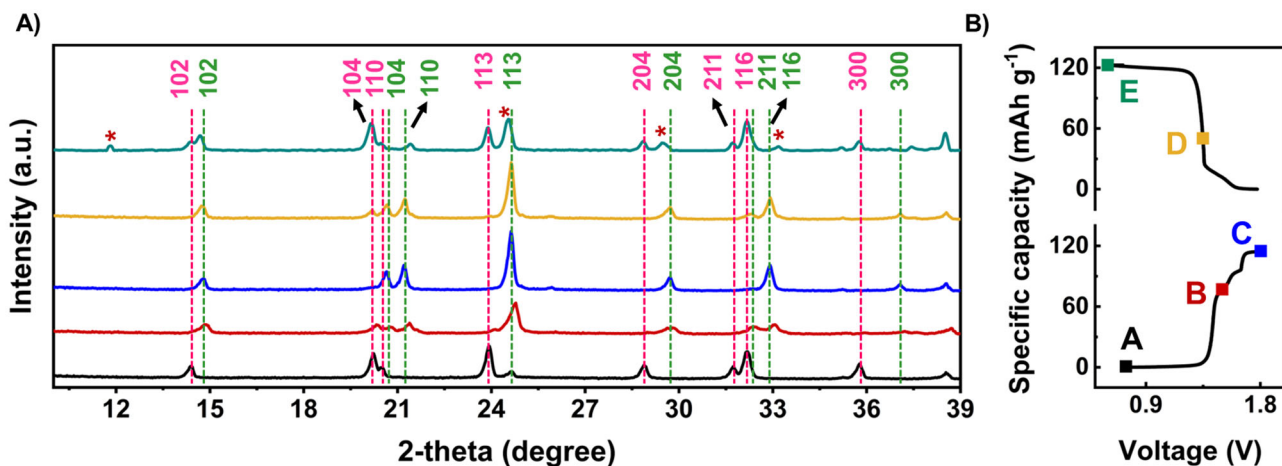

**Fig. S27** (A) Ex-situ XRD patterns of NVP cathode. (B) GCD curve of the full cell for the first cycle at  $0.4 \text{ A g}^{-1}$ . Points A–E marked the states where data were collected for XRD analysis. From point A to C, the peaks associated with  $\text{Na}_3\text{V}_2(\text{PO}_4)_3$  (dash pink) gradually decreased, while those related to  $\text{NaV}_2(\text{PO}_4)_3$  (dash green) emerged. And the discharging process from point C to E, additional peaks at around  $12.2^\circ$ ,  $24.4^\circ$ ,  $29.4^\circ$ , and  $33.2^\circ$  appeared, indicating the formation of  $\text{Na}_x\text{Zn}_{1.5-0.5x}\text{V}_2(\text{PO}_4)_3$  ( $0 < x < 3$ ) due to  $\text{Zn}^{2+}$  insertion into the  $\text{Na}_3\text{V}_2(\text{PO}_4)_3$  phase.

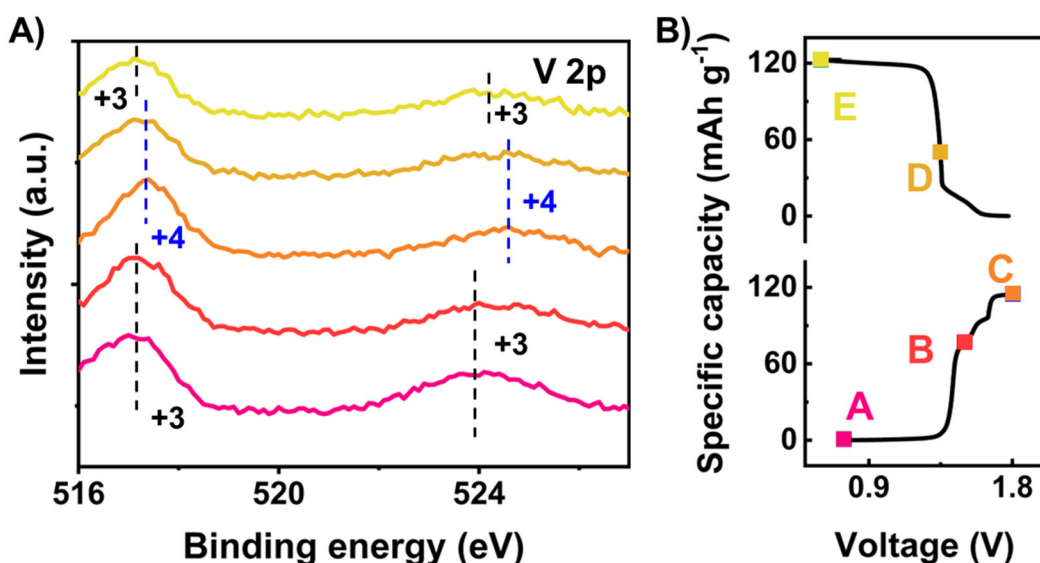

**Fig. S28** (A) Ex-situ XPS spectra of NVP cathode at different discharged and charged states. (B) Corresponding GCD curve of the NVP||Zn cell for the first cycle at  $0.4 \text{ A g}^{-1}$ . Points A-E marked the states where data were collected for XPS analysis.

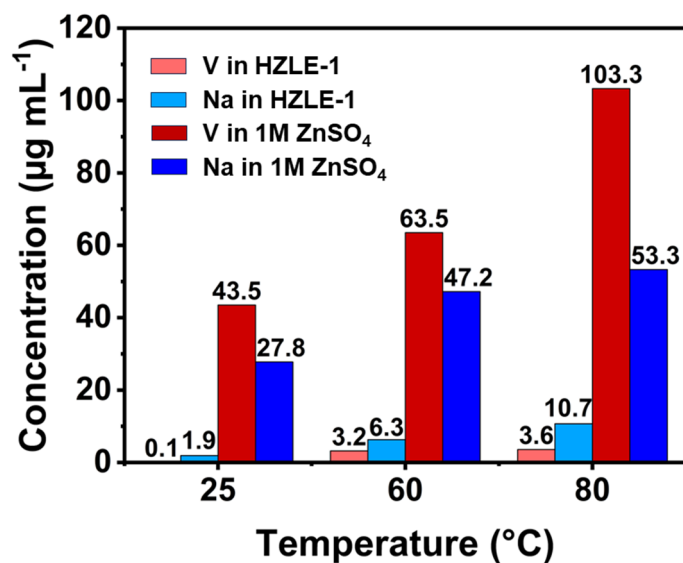

**Fig. S29** Concentrations of vanadium (V) and sodium (Na) in the HZLE-1 after 10 cycles of NVP||Zn cell at  $25 \text{ }^{\circ}\text{C}$ ,  $60 \text{ }^{\circ}\text{C}$ , and  $80 \text{ }^{\circ}\text{C}$  and in the  $1\text{M ZnSO}_4$  electrolyte after 10 cycles of NVP||Zn cell at  $25 \text{ }^{\circ}\text{C}$ ,  $60 \text{ }^{\circ}\text{C}$ . The concentrations of V and Na in the  $1\text{M ZnSO}_4$  electrolyte were investigated after 3 cycles of NVP||Zn cell at  $80 \text{ }^{\circ}\text{C}$ , as a consequence of the cell failure that occurred after 3 cycles.

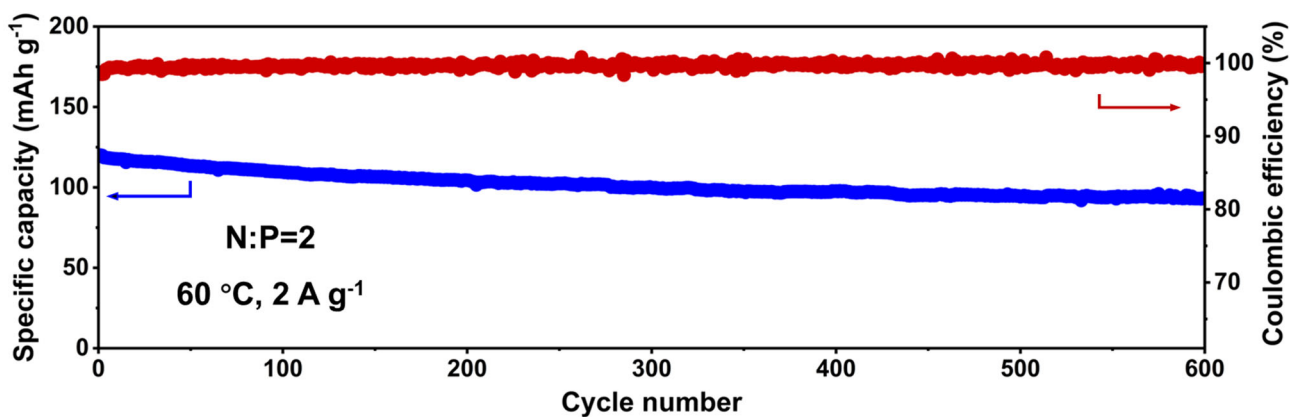

**Fig. S30** Long-term stability of the NVP||Zn cell at  $2 \text{ A g}^{-1}$  under  $60 \text{ }^\circ\text{C}$ . The N:P ratio is 2.

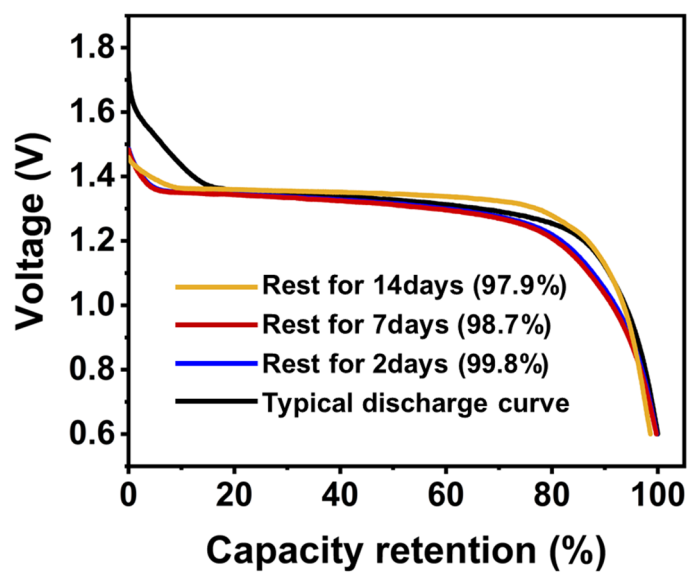

**Fig. S31** Self-discharge performance of NVP||Zn cell with HZLE-1, which was measured at  $80 \text{ }^\circ\text{C}$  with a current density of  $2 \text{ A g}^{-1}$ .



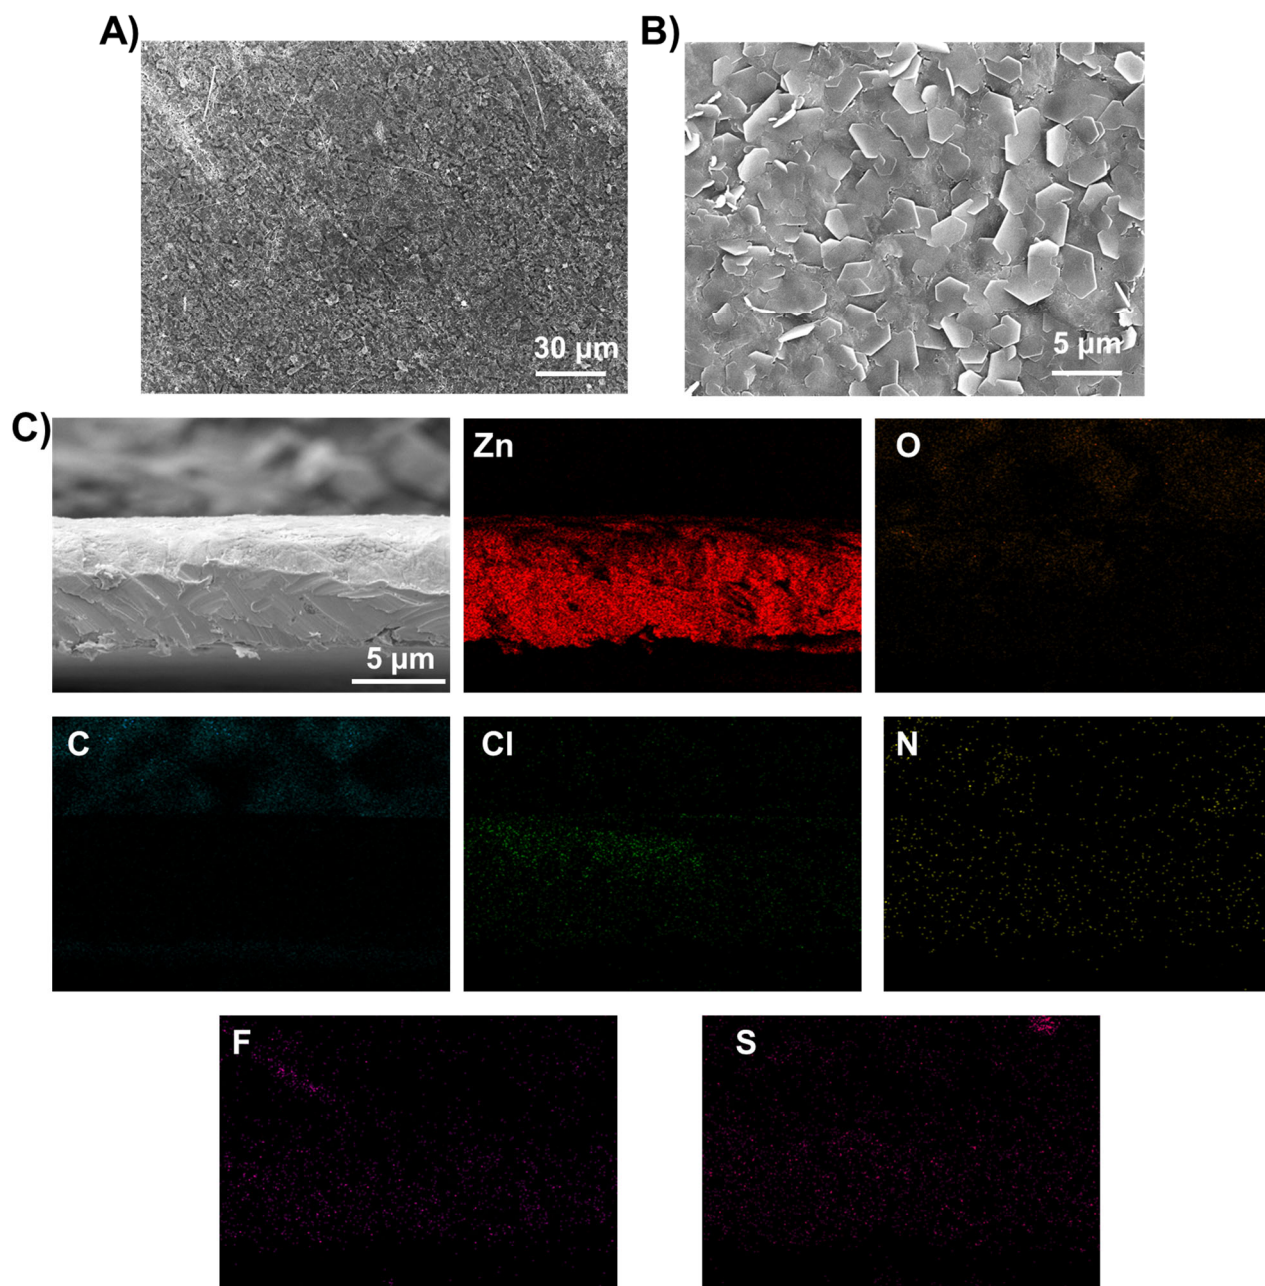

**Fig. S32** SEM images of the surface region of the Zn anode cycled with HZLE-1 in the NVP||Zn full cell at 25 °C with (A) the scale bar of 30 μm, and (B) 5 μm. (C) SEM cross-sectional image of Zn metal anode after cycles of NVP||Zn cell with HZLE-1 at 25 °C and its corresponding EDS mappings. The distribution of Zn was observed without other elements distributed on the cross-section of the Zn anode.

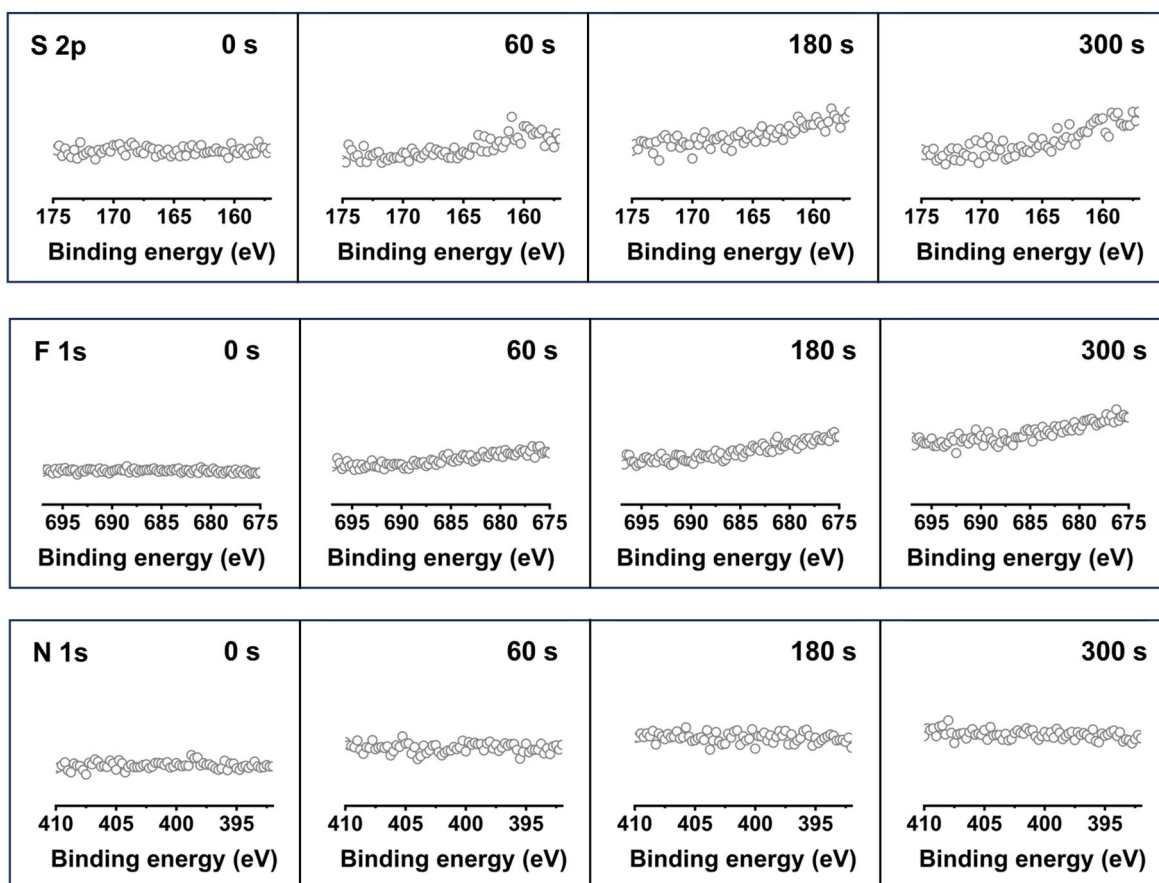

**Fig. S33** XPS spectra with depth profiles of S 2p, F 1s, and N 1s of the Zn anode in NVP||Zn cell at 25 °C with 1000 cycles.



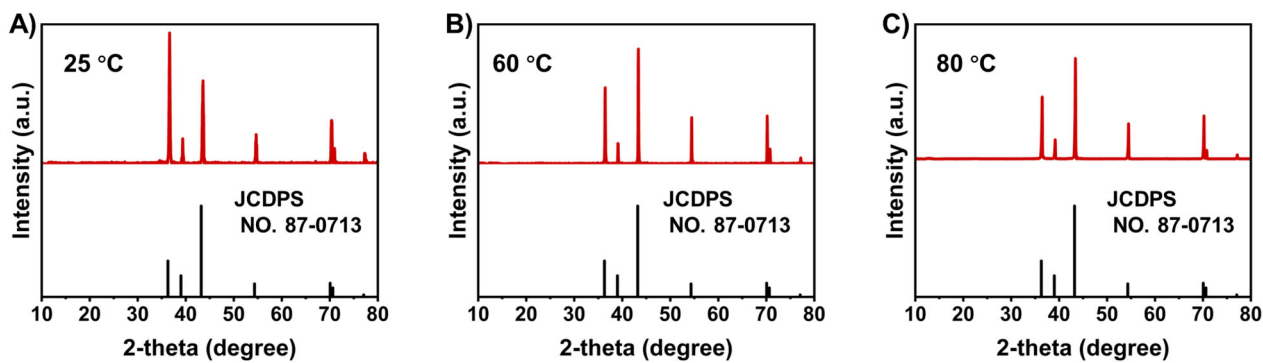

**Fig. S34** XRD patterns of Zn anode after 50 cycles with HZLE-1 in the NVP||Zn full cell at (A) 25 °C, (B) 60 °C, and (C) 80 °C.

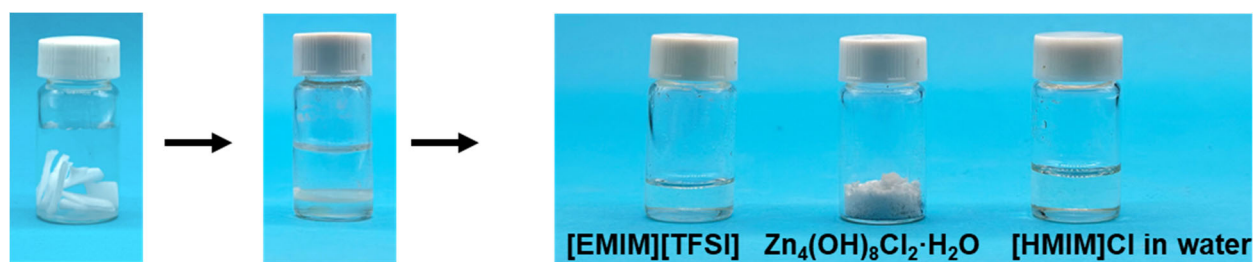

**Fig. S35** Photos of the recyclability of HZLE-1. [HMIM]Cl was dissolved in water, while [EMIM][TFSI] was insoluble in water and  $Zn_4(OH)_8Cl_2 \cdot H_2O$  was precipitated in water. Thus, [EMIM][TFSI] was separated by liquid-liquid phase separation and the  $Zn_4(OH)_8Cl_2 \cdot H_2O$  and [HMIM]Cl were obtained by filtration.

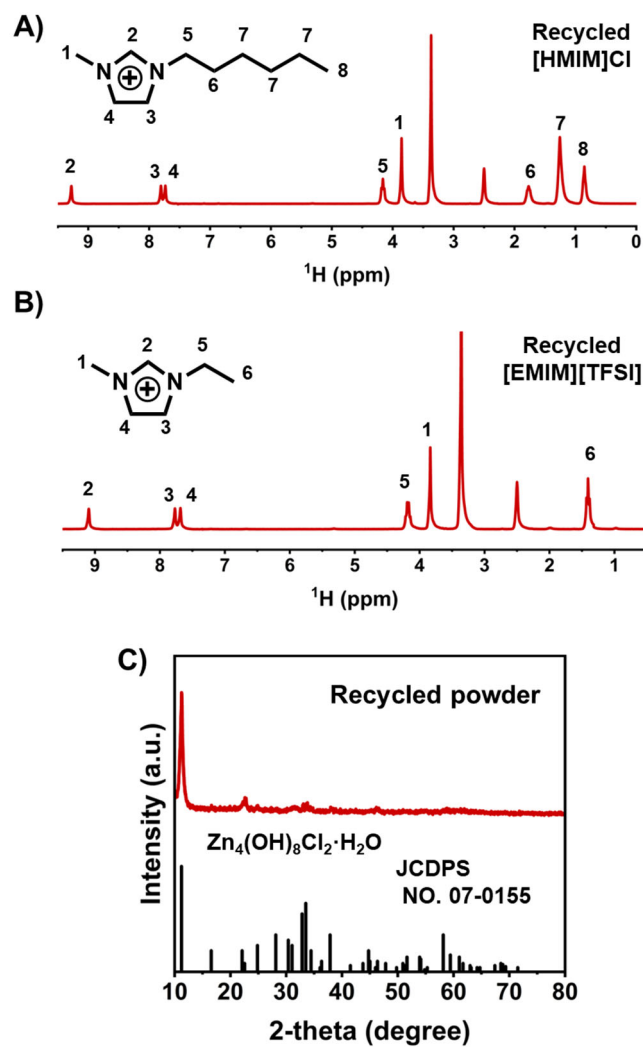

**Fig. S36**  $^1H$  NMR spectra of (A) recycled [HMIM]Cl, (B) recycled [EMIM][TFSI]. (C) XRD pattern of recycled  $Zn_4(OH)_8Cl_2 \cdot H_2O$ .

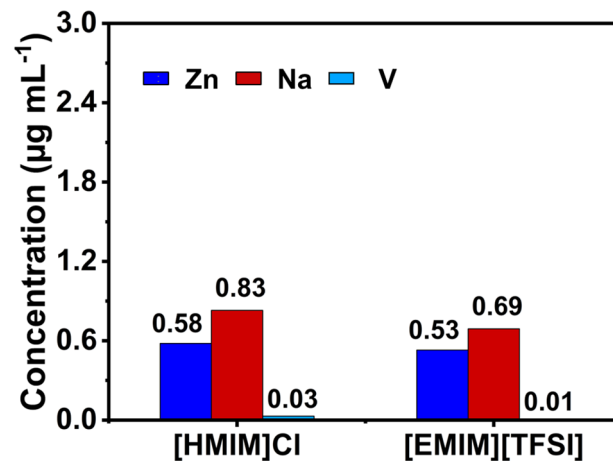

**Fig. S37** Concentrations of Zn, Na, V in recycled [HMIM]Cl and recycled [EMIM][TFSI].

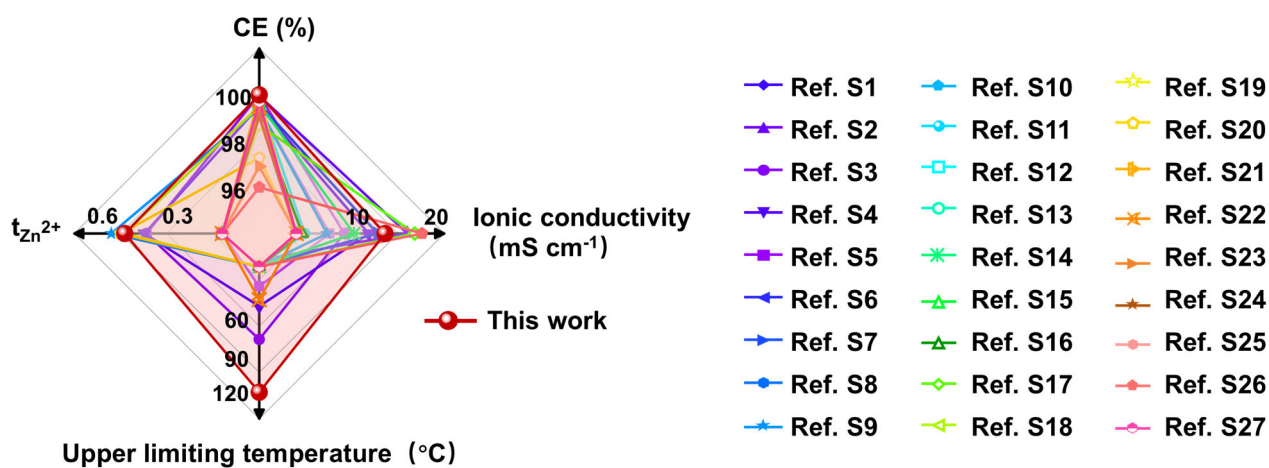

**Fig. S38** Comprehensive comparison of the CE, ionic conductivity, upper limiting temperature, and  $t_{\text{Zn}^{2+}}$  for our work to the other reported literature.

**Table S1** Fitting results of the equivalent circuit diagrams before and after polarization of the Zn||Zn symmetric cell at 25 °C.

|                     | $R_b$ ( $\Omega$ ) | $R_i$ ( $\Omega$ ) |
|---------------------|--------------------|--------------------|
| Before polarization | 67.73              | 47.61              |
| After polarization  | 64.52              | 59.40              |

**Table S2** Parameters measured by d.c. polarization and EIS for calculating the  $t_{Zn^{2+}}$ .

|        | $I^0$ ( $\mu A$ ) | $I^{ss}$ ( $\mu A$ ) | $R_i^0$ ( $\Omega$ ) | $R_i^{ss}$ ( $\Omega$ ) | $t_{Zn^{2+}}$ |
|--------|-------------------|----------------------|----------------------|-------------------------|---------------|
| HZLE-1 | 9.62              | 5.11                 | 47.61                | 59.40                   | 0.53          |

**Table S3** Intensities obtained from textured samples  $I_{(hkl)}$  under different conditions and the intensities of the standard oriented sample  $I_{(hkl)}$  of Zn anodes.

| Texture      | 002   | 100  | 101   | 102  | 103  | 110  | 004  |                                         |
|--------------|-------|------|-------|------|------|------|------|-----------------------------------------|
| $I_0$        | 39.6  | 23.3 | 100   | 14.4 | 15.2 | 10   | 2.3  | JCPDS<br>NO. 87-0713                    |
|              | 2632  | 601  | 701   | 744  | 887  | 259  | 27   | 25 °C, DOD=50%                          |
|              | 21547 | 4145 | 22442 | 7175 | 8237 | 1688 | 106  | 25 °C, DOD=80%                          |
|              | 18654 | 1854 | 8968  | 2240 | 3483 | 2915 | 1061 | 80 °C, DOD=50%                          |
| $I_{HZLE-1}$ | 6079  | 968  | 6995  | 2199 | 2114 | 737  | 476  | 80 °C, DOD=80%                          |
|              | 12595 | 2686 | 15065 | 3846 | 4311 | 2149 | 1069 | 120 °C,<br>DOD=50%                      |
|              | 12714 | 3037 | 16599 | 5145 | 5634 | 1624 | 637  | 120 °C,<br>DOD=80%                      |
| $I_0$        | 53    | 40   | 100   | 28   | 25   | 21   | 2    | JCPDS<br>NO. 04-0831                    |
|              | 9684  | 4085 | 19102 | 5145 | 5417 | 1646 | 919  | Pristine Zn                             |
| $I$          | 516   | 240  | 1271  | 420  | 405  | 70   | 103  | 25 °C, DOD=10%<br>1 M ZnSO <sub>4</sub> |

**Table S4** Atomic percentage (%) of each element in the pristine cathode of NVP and the NVP after charging at 0.6 V obtained by XPS spectra.

| <b>Atom (%)</b> | <b>Na</b> | <b>Zn</b> | <b>V</b> | <b>P</b> | <b>Chemical formula</b>                                     |
|-----------------|-----------|-----------|----------|----------|-------------------------------------------------------------|
| Pristine        | 3.82      | 0         | 2.51     | 3.7      | $\text{Na}_3\text{V}_2(\text{PO}_4)_3$                      |
| After charging  | 0.85      | 1.35      | 2.3      | 3.52     | $\text{Na}_{0.73}\text{Zn}_{1.17}\text{V}_2(\text{PO}_4)_3$ |

The quantitative analysis of XPS is based on the fact that the intensity of the photoelectron spectral lines (the area of the photoelectron peaks) reflects the atomic content. Therefore, by integrating the peaks of the xps spectrum, the changes in the elemental content of the NVP before and after charging were obtained. And the theoretical capacity was calculated by Equation S7:

$$C = \frac{nF}{3.6M} \text{ (mAh g}^{-1}\text{)} \quad (\text{S7})$$

where  $n$  represents the number of electrons involved in the electrochemical reaction,  $F$  is Faraday's constant ( $96485 \text{ C mol}^{-1}$ ), and  $M$  is the molar mass of the active substance.

**Table S5** Recovery rates and mass of [HMIM]Cl and [EMIM][TFSI] by extraction for multi-component separation.

|              | <b>m<sub>pristine</sub> (g)</b> | <b>m<sub>recycled</sub> (g)</b> | <b>Recovery rate</b> |
|--------------|---------------------------------|---------------------------------|----------------------|
| [HMIM]Cl     | 2.02                            | 1.88                            | 93%                  |
| [EMIM][TFSI] | 1.96                            | 1.86                            | 95%                  |

The reaction equation for hydrolysis is

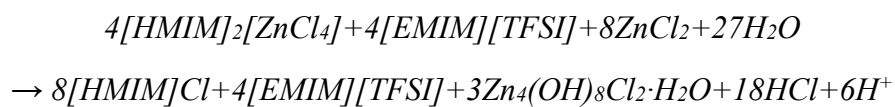

**Table S6.** Comparison of the Coulombic efficiency, ionic conductivities, upper limiting temperature, and  $t_{Zn^{2+}}$  of reported literature developed for high-performance Zn metal batteries.<sup>S1–S27</sup>

|                                           | <b>Coulombic efficiency (%)</b> | <b>Ionic conductivity (mS cm<sup>-1</sup>)</b> | <b>Upper limiting temperature (°C)</b> | <b><math>t_{Zn^{2+}}</math></b> |
|-------------------------------------------|---------------------------------|------------------------------------------------|----------------------------------------|---------------------------------|
| <b>This work</b>                          | <b>99.99%</b>                   | <b>12</b>                                      | <b>120</b>                             | <b>0.53</b>                     |
| Nature Sustainability 2022, 5, 205–213    | 99.40%                          | 4.5                                            | 40                                     | N.A.                            |
| Nature Sustainability 2023, 6, 325–335    | 99.99%                          | 6.5                                            | 80                                     | 0.41                            |
| Nature Sustainability 2023, 6, 806–815    | 99.95%                          | 15                                             | 20                                     | N.A.                            |
| Nature Sustainability 2023, 6, 1474–1484  | 99.50%                          | 9.8                                            | 55                                     | 0.421                           |
| Nature Materials 17, 2018, 543–549        | 99.70%                          | N.A.                                           | 25                                     | N.A.                            |
| Energy Environ. Sci., 2023, 16, 2540–2549 | 99.60%                          | 11                                             | 25                                     | N.A.                            |
| Energy Environ. Sci., 2023, 17, 717–726   | 98.04%                          | N.A.                                           | 25                                     | N.A.                            |
| Energy Environ. Sci., 2024, 17, 3443–3453 | 99.39%                          | 4.15                                           | 25                                     | 0.6                             |
| Angew. Chem.Int. Ed. 2022, 61, e202206717 | 99.70%                          | 1.15                                           | 25                                     | N.A.                            |
| Angew. Chem.Int. Ed. 2022, 61, e202211589 | 98.50%                          | N.A.                                           | 25                                     | N.A.                            |
| Angew. Chem.Int. Ed. 2022, 61, e202212780 | 99.57%                          | N.A.                                           | 25                                     | N.A.                            |
| Angew. Chem.Int. Ed. 2024, 63, e202316499 | 99.60%                          | 7.8                                            | 25                                     | N.A.                            |
| Angew. Chem.Int. Ed.2023, 62, e202302174  | 99.57%                          | N.A.                                           | 25                                     | N.A.                            |
| Angew. Chem.Int. Ed. 2024, 63, e202318496 | 99%                             | 0.79                                           | 25                                     | N.A.                            |
| Angew. Chem.Int. Ed. 2023, 62, e202307880 | 98.70%                          | 16                                             | 25                                     | N.A.                            |
| Angew. Chem.Int. Ed. 2023, 62, e202302302 | 99.50%                          | N.A.                                           | 25                                     | 0.53                            |
| Angew. Chem.Int. Ed. 2024, 63, e202402206 | 99.90%                          | N.A.                                           | 25                                     | N.A.                            |
| Angew. Chem.Int. Ed. 2024, 63, e202319051 | 97.27%                          | N.A.                                           | 25                                     | 0.55                            |
| Angew. Chem.Int. Ed. 2024, 63, e202403050 | 99.51%                          | N.A.                                           | 50                                     | N.A.                            |
| J. Am. Chem. Soc. 2023, 145, 22456–22465  | 99.50%                          | N.A.                                           | 55                                     | N.A.                            |
| J. Am. Chem. Soc. 2024, 146, 9455–9464    | 99.55%                          | 6                                              | 25                                     | N.A.                            |
| Joule 2022, 6, 1103–1120                  | 99.80%                          | N.A.                                           | 25                                     | N.A.                            |
| Adv.Mater.2022, 34, 2206963               | 96.90%                          | N.A.                                           | 25                                     | N.A.                            |
| Adv.Mater.2022, 34, 2207344               | 99.06%                          | N.A.                                           | 25                                     | N.A.                            |
| Adv. Mater.2023,35, 2210055               | 99.70%                          | N.A.                                           | 25                                     | N.A.                            |
| Adv.Mater.2023, 35, 2207131               | 96%                             | 17                                             | 25                                     | N.A.                            |
| Adv. Mater.2024,36, 2306145               | 99.70%                          | N.A.                                           | 25                                     | N.A.                            |



## Movie S1

An MD simulated process of Zn<sup>2+</sup> transport in the HZLE-1 system with electric field.

## Movie S2

NVP||Zn pouch cell powered an electronic timer at 80 °C.

## Supplementary references

- S1. D. Han, C. Cui, K. Zhang, Z. Wang, J. Gao, Y. Guo, Z. Zhang, S. Wu, L. Yin, Z. Weng, F. Kang and Q. H. Yang, *Nat. Sustain.*, 2022, **5**, 205–213.
- S2. C. Yang, J. Xia, C. Cui, T. P. Pollard, J. Vatamanu, A. Faraone, J. A. Dura, M. Tyagi, A. Kattan, E. Thimsen, J. Xu, W. Song, E. Hu, X. Ji, S. Hou, X. Zhang, M. S. Ding, S. Hwang, D. Su, Y. Ren, X. Q. Yang, H. Wang, O. Borodin and C. Wang, *Nat. Sustain.*, 2023, **6**, 325–335.
- S3. H. Jiang, L. Tang, Y. Fu, S. Wang, S. K. Sandstrom, A. M. Scida, G. Li, D. Hoang, J. J. Hong, N. C. Chiu, K. C. Stylianou, W. F. Stickle, D. Wang, J. Li, P. A. Greaney, C. Fang and X. Ji, *Nat. Sustain.*, 2023, **6**, 806–815.
- S4. D. Dong, T. Wang, Y. Sun, J. Fan and Y. C. Lu, *Nat. Sustain.*, 2023, **6**, 1474–1484.
- S5. F. Wang, O. Borodin, T. Gao, X. Fan, W. Sun, F. Han, A. Faraone, J. A. Dura, K. Xu and C. Wang, *Nat. Mater.*, 2018, **17**, 543–549.
- S6. R. Chen, C. Zhang, J. Li, Z. Du, F. Guo, W. Zhang, Y. Dai, W. Zong, X. Gao, J. Zhu, Y. Zhao, X. Wang and G. He, *Energy Environ. Sci.*, 2023, **16**, 2540–2549.
- S7. L. Zhi, C. Liao, P. Xu, F. Sun, C. Yuan, F. Fan, G. Li, Z. Yuan and X. Li, *Energy Environ. Sci.*, 2023, **17**, 717–726.
- S8. Z. Yang, Y. Sun, S. Deng, H. Tong, M. Wu, X. Nie, Y. Su, G. He, Y. Zhang, J. Li and G. Chai, *Energy Environ. Sci.*, 2024, **17**, 3443–3453.
- S9. L. Geng, J. Meng, X. Wang, C. Han, K. Han, Z. Xiao, M. Huang, P. Xu, L. Zhang, L. Zhou and L. Mai, *Angew. Chemie - Int. Ed.*, 2022, **61**, e202206717.
- S10. M. Kim, S. J. Shin, J. Lee, Y. Park, Y. Kim, H. Kim and J. W. Choi, *Angew. Chemie - Int.*

- Ed.*, 2022, **61**, e202211589.
- S11. B. Liu, C. Wei, Z. Zhu, Y. Fang, Z. Bian, X. Lei, Y. Zhou, C. Tang, Y. Qian and G. Wang, *Angew. Chemie - Int. Ed.*, 2022, **61**, e202212780.
- S12. W. Deng, Z. Deng, Y. Chen, R. Feng and X. Wang, *Angew. Chemie - Int. Ed.*, 2024, **63**, e202316499.
- S13. B. Raza, Y. Zhang, J. Chen, U. Shamraiz, Y. Zhang, A. Naveed and J. Wang, *Angew. Chemie - Int. Ed.*, 2023, **62**, e202302174.
- S14. F. Bu, Y. Gao, W. Zhao, Q. Cao, Y. Deng, J. Chen, J. Pu, J. Yang, Y. Wang, N. Yang, T. Meng, X. Liu and C. Guan, *Angew. Chemie - Int. Ed.*, 2024, **63**, e202318496.
- S15. L. Zhou, R. Yang, S. Xu, X. Lei, Y. Zheng, J. Wen, F. Zhang and Y. Tang, *Angew. Chemie - Int. Ed.*, 2023, **62**, e202307880.
- S16. J. Luo, L. Xu, Y. Zhou, T. Yan, Y. Shao, D. Yang, L. Zhang, Z. Xia, T. Wang, L. Zhang, T. Cheng and Y. Shao, *Angew. Chemie - Int. Ed.*, 2023, **62**, e202302302.
- S17. Z. Wu, Y. Li, A. Amardeep, Y. Shao, Y. Zhang, J. Zou, L. Wang, J. Xu, D. Kasprzak, E. Hansen and J. Liu, *Angew. Chemie Int. Ed.*, 2024, **63**, e202402206.
- S18. Q. Wu, J. Huang, J. Zhang, S. Yang, Y. Li, F. Luo, Y. You, Y. Li, H. Xie and Y. Chen, *Angew. Chemie - Int. Ed.*, 2024, **63**, e202319051.
- S19. S. Zhou, X. Meng, Y. Chen, J. Li, S. Lin, C. Han, X. Ji, Z. Chang and A. Pan, *Angew. Chemie - Int. Ed.*, 2024, **63**, e202403050.
- S20. W. Xu, J. Li, X. Liao, L. Zhang, X. Zhang, C. Liu, K. Amine, K. Zhao and J. Lu, *J. Am. Chem. Soc.*, 2023, **145**, 22456–22465.
- S21. K. Zhou, G. Liu, X. Yu, Z. Li and Y. Wang, *J. Am. Chem. Soc.*, 2024, **146**, 9455–9464.
- S22. C. Li, A. Shyamsunder, A. G. Hoane, D. M. Long, C. Y. Kwok, P. G. Kotula, K. R. Zavadil, A. A. Gewirth and L. F. Nazar, *Joule*, 2022, **6**, 1103–1120.
- S23. J. Hao, L. Yuan, Y. Zhu, M. Jaroniec and S. Z. Qiao, *Adv. Mater.*, 2022, **34**, 2206963.
- S24. Q. Ma, R. Gao, Y. Liu, H. Dou, Y. Zheng, T. Or, L. Yang, Q. Li, Q. Cu, R. Feng, Z. Zhang, Y. Nie, B. Ren, D. Luo, X. Wang, A. Yu and Z. Chen, *Adv. Mater.*, 2022, **34**, 2207344.
- S25. H. Du, Y. Dong, Q. J. Li, R. Zhao, X. Qi, W. H. Kan, L. Suo, L. Qie, J. Li and Y. Huang, *Adv. Mater.*, 2023, **35**, 2210055.

- S26. P. Chen, X. Sun, T. Pietsch, B. Plietker, E. Brunner and M. Ruck, *Adv. Mater.*, 2023, **35**, 2207131.
- S27. C. Wang, J. Z. J. Zhu, S. Vi-Tang, B. Peng, C. Ni, Q. Li, X. Chang, A. Huang, Z. Yang, E. J. Savage, S. Uemura, Y. Katsuyama, M. F. El-Kady and R. B. Kaner, *Adv. Mater.*, 2024, **36**, 2306145.
